1 **CHMP2B regulates TDP-43 phosphorylation and proteotoxicity via modulating**  
2 **CK1 turnover independent of the autophagy-lysosomal pathway**

3 Xing Sun<sup>1,2,5</sup>, Xue Deng<sup>1,2,5</sup>, Rirong Hu<sup>1,2</sup>, Yongjia Duan<sup>1</sup>, Kai Zhang<sup>1,2</sup>, Jihong Cui<sup>1</sup>, Jiangxia Ni<sup>1,2</sup>,  
4 Qiangqiang Wang<sup>1</sup>, Yelin Chen<sup>1,2</sup>, Ang Li<sup>3,4\*</sup>, and Yanshan Fang<sup>1,2\*</sup>.

5 <sup>1</sup>Interdisciplinary Research Center on Biology and Chemistry, Shanghai Institute of Organic  
6 Chemistry, Chinese Academy of Sciences, Shanghai 201210, China

7 <sup>2</sup>University of Chinese Academy of Sciences, Beijing 100049, China

8 <sup>3</sup>Guangdong-Hong Kong-Macau Institute of CNS Regeneration, Joint International Research  
9 Laboratory of CNS Regeneration Ministry of Education, Jinan University, Guangzhou 510632,  
10 China

11 <sup>4</sup>Guangzhou Regenerative Medicine and Health Guangdong Laboratory, Guangzhou 510005,  
12 China

13 <sup>5</sup>These authors contributed equally

14 **\*Correspondence to:**

15 **Ang Li:** [anglijnu@jnu.edu.cn](mailto:anglijnu@jnu.edu.cn)

16 **Yanshan Fang:** [fangys@sioc.ac.cn](mailto:fangys@sioc.ac.cn)

17 **Tel:** +86-21-6858.2510

18 **ORCID:** <https://orcid.org/0000-0002-4123-0174>

19 **Short title:** Linking CHMP2B to pTDP-43 via CK1

20 **Keywords (5~10):** ALS, FTD, ESCRT, CHMP2B, TDP-43, phosphorylation, CK1, UPS

21 **This PDF file includes:**

22 Main text: ~7,500 words (excluding the title page and references)

23 Figures 1 to 6

24 Supplemental Figures S1 to S6

25

26 **ABSTRACT** (< 250 words)

27 Protein inclusions containing phosphorylated TDP-43 are a shared pathology in several  
28 neurodegenerative diseases including amyotrophic lateral sclerosis (ALS) and frontotemporal  
29 dementia (FTD). However, most ALS/FTD patients do not have a mutation in TDP-43 or the  
30 enzymes directly regulating its phosphorylation. It is intriguing how TDP-43 becomes  
31 hyperphosphorylated in each disease condition. In a genetic screen for novel TDP-43 modifiers,  
32 we found that knockdown (KD) of *CHMP2B*, a key component of the endosomal sorting complex  
33 required for transport (ESCRT) machinery, suppressed TDP-43-mediated neurodegeneration in  
34 *Drosophila*. Further investigation using mammalian cells indicated that *CHMP2B* KD decreased  
35 whereas its overexpression (OE) increased TDP-43 phosphorylation levels. Moreover, a known  
36 FTD-causing mutation *CHMP2B*<sup>intron5</sup> promoted hyperphosphorylation, insolubility and  
37 cytoplasmic accumulation of TDP-43. Interestingly, CHMP2B did not manifest these effects by its  
38 well-known function in the autophagy-lysosomal pathway. Instead, the kinase CK1 tightly  
39 regulated TDP-43 phosphorylation level in cells, and CHMP2B OE or CHMP2B<sup>Intron5</sup> significantly  
40 decreased ubiquitination and the turnover of CK1 via the ubiquitin-proteasome (UPS) pathway.  
41 Finally, we showed that CHMP2B protein levels increased in the cerebral cortices of aged mice,  
42 which might underlie the age-associated TDP-43 pathology and disease onset. Together, our  
43 findings reveal a molecular link between the two ALS/FTD-pathogenic proteins CHMP2B and  
44 TDP-43, and provide an autophagy-independent mechanism for CHMP2B in pathogenesis.

45 **SIGNIFICANCE STATEMENT** (< 120 words)

46 TDP-43 and CHMP2B are both ALS/FTD-associated proteins. Protein aggregations containing  
47 phosphorylated TDP-43 are a pathological hallmark of ALS/FTD; however, it is unclear how  
48 increased phosphorylation of TDP-43 occurs in diseases. The pathogenesis of CHMP2B has  
49 mainly been considered as a consequence of autophagy-lysosomal dysfunction. Here, we reveal  
50 that increase of CHMP2B levels (which occurs in aged mouse brains) or expression of the  
51 disease-causing mutation CHMP2B<sup>Intron5</sup> promotes TDP-43 hyperphosphorylation, insolubility  
52 and cytoplasmic mislocalization. This effect is independent of the autophagy-lysosomal pathway  
53 but rather relies on the proteasome-mediated turnover of the kinase CK1 that phosphorylates  
54 TDP-43. Together, we provide a new molecular mechanism of CHMP2B pathogenesis by linking  
55 it to TDP-43 pathology via CK1.

## 56 INTRODUCTION

57 TAR DNA-binding protein 43 (TDP-43) is a nuclear RNA/DNA-binding protein that can shuttle  
58 between the nucleus and the cytoplasm. Under normal conditions, TDP-43 participates in the  
59 assembly and function of various ribonucleoprotein (RNP) complexes and plays an important  
60 role in regulating RNA processing and metabolism (Chen-Plotkin et al., 2010; Cohen et al., 2011;  
61 Lee et al., 2012). In disease, abnormal TDP-43 protein inclusions are found in ~97% ALS and  
62 ~45% FTD patients (Ling et al., 2013; Tan et al., 2017). In fact, TDP-43 is a major pathological  
63 protein linked to a spectrum of neurological disorders, collectively known as TDP-43  
64 proteinopathies, which include not only ALS and FTD but also Alzheimer's disease (AD),  
65 dementia with Lewy bodies and polyglutamine diseases (Neumann et al., 2007; Higashi et al.,  
66 2007; Arai et al., 2009; Toyoshima et al., 2014; Chang et al., 2016). TDP-43 pathology is  
67 characterized by hyperphosphorylation of the protein at serine 409 and 410 (pS409/410)  
68 (Hasegawa et al., 2008; Neumann et al., 2009). Despite being a shared pathology, mutations in  
69 *TARDBP* (the gene encoding TDP-43) only account for 1~5% family ALS and about 1% family  
70 FTD (Ji et al., 2017), and none of the known ALS/FTD causal genes encodes a kinase or  
71 phosphatase that directly regulates TDP-43 phosphorylation (Pottier et al., 2016; Corcia et al.,  
72 2017). As such, it is largely unknown how the pathological processes that promote TDP-43  
73 phosphorylation and aggregation occur in most ALS/FTD cases.

74 Phosphorylation of TDP-43 is closely related to its insolubility, aggregation tendency,  
75 cytoplasmic mislocalization and the pathogenesis. For example, phosphorylated TDP-43  
76 (pTDP-43) is more detergent-insoluble, has a longer half-life, forms high-molecular weight  
77 oligomers and fibrils, and accumulates cytoplasmic aggregations in cells (Liachko et al., 2010;  
78 Zhang et al., 2010; Choksi et al., 2014; Nonaka et al., 2016; Yamashita et al., 2016), and plasma  
79 pTDP-43 levels correlate with the extent of brain pathology in FTD patients (Foulds et al., 2009).  
80 Casein kinase 1 (CK1) is a family of serine/threonine-selective kinases, which phosphorylate key  
81 proteins and function in developmental signaling such as Hedgehog and Wnt pathways as well  
82 as in regulating circadian rhythms and cellular metabolism (Cheong and Virshup, 2011; Cruiciat,

83 2014; Jiang, 2017). Recently, mounting evidence suggests the relevance of CK1 in human  
84 diseases such as cancer and neurodegenerative disorders (Perez et al., 2011; Cozza and Pinna,  
85 2016). In particular, CK1 could phosphorylate TDP-43 *in vitro* (Hasegawa et al., 2008; Kametani  
86 et al., 2009) and the phosphorylated epitopes generated by CK1 could be strongly recognized by  
87 TDP-43 antibodies in immunohistological examinations of FTD and ALS brains (Hasegawa et al.,  
88 2008). In cell and animal models, expression of a hyperactive form of CK1 $\delta$  promoted TDP-43  
89 phosphorylation (Nonaka et al., 2016), whereas CK1 inhibitors were shown to reduce TDP-43  
90 phosphorylation and suppress its toxicity in mammalian cell cultures, fly and mouse neurons,  
91 and human cells derived from FTD and ALS patients (Salado et al., 2014; Alquezar et al., 2016;  
92 Martinez-Gonzalez et al., 2020). Thus, modulating CK1 activity may be a potential therapeutic  
93 approach for treating FTD and ALS. However, whether and how CK1 is involved in the disease  
94 pathogenesis is unclear.

95 *Charged multivesicular body protein 2B (CHMP2B)* is another gene whose mutations are  
96 associated with both ALS and FTD (Skibinski et al., 2005; Parkinson et al., 2006; Cox et al.,  
97 2010). It encodes the ESCRT-III subunit protein CHMP2B, which plays a vital role in  
98 endolysosomal trafficking, vesicle fusion and autophagic degradations (Urwin et al., 2009;  
99 Henne et al., 2011). Among the disease-associated mutations in the *CHMP2B* gene, the most  
100 studied is CHMP2B<sup>Intron5</sup> in FTD linked to chromosome 3 (FTD-3). It is a single nucleotide (G→C)  
101 mutation in exon 6, causing aberrant splicing inclusive of the 201 bp of intron 5, which contains a  
102 stop codon and leads to a truncation of the C-terminus of CHMP2B. The resulting CHMP2B<sup>Intron5</sup>  
103 protein lacks the important binding site for Vps4, whose recruitment is required to initiate  
104 membrane abscission and the disassembly of the ESCRT-III complex. Besides, as the  
105 CHMP2B<sup>Intron5</sup> protein loses 36 amino acids from the acidic C-terminus, its self-binding to the  
106 basic N-terminus is significantly reduced, which disrupts the normal autoinhibition in CHMP2B  
107 (Urwin et al., 2009; Isaacs et al., 2011; Krasniak and Ahmad, 2016). Dysfunction of the  
108 ESCRT-III complex leads to accumulation of endosomes and autophagosomes, which has been  
109 evident in a variety of cell and animal models (Lee et al., 2007; van der Zee et al., 2008; Urwin et

110 al., 2010; Ghazi-Noori et al., 2012; Clayton et al., 2015). Thus, the CHMP2B pathogenesis has  
111 mainly been considered as a downstream consequence of the disrupted autophagic and  
112 endolysosomal pathway. In addition, TDP-43-immunoreactive inclusion bodies were found in  
113 motor neurons and glia of ALS patients containing *CHMP2B* mutations (ALS17) (Cox et al.,  
114 2010). However, it remains unclear whether CHMP2B and TDP-43 are molecularly linked and  
115 how this contributes to ALS/FTD pathogenesis.

116 In this study, we identify CHMP2B as a novel modifier of TDP-43 neurotoxicity in a fly  
117 genetic screen. Further investigation reveals a striking role of CHMP2B in regulating TDP-43  
118 phosphorylation levels, protein solubility and subcellular distribution. Unexpectedly, although  
119 manipulation of CHMP2B levels or expression of CHMP2B<sup>intron5</sup> indeed impacts on the  
120 autophagy-lysosomal proteolysis, disruption of this pathway does not alter TDP-43  
121 phosphorylation levels, suggesting an autophagy-independent mechanism. Rather, it is the  
122 kinase CK1 that mediates the modifying effect of CHMP2B on TDP-43 phosphorylation and  
123 cytotoxicity, as CHMP2B modulates the abundance of CK1 via the UPS-dependent protein  
124 turnover. Together, we propose that a molecular axis of “CHMP2B–CK1–TDP-43” may be  
125 involved in the pathogenesis of ALS/FTD and related diseases.

## 126 RESULTS

### 127 Downregulation of *CHMP2B* alleviates TDP-43 neurotoxicity in a *Drosophila* model

128 To identify unknown players involved in TDP-43-mediated neurodegeneration, we conducted a  
129 genetic screen for new modifiers of TDP-43 neurotoxicity using a *Drosophila* model that  
130 expressed human TDP-43 (*hTDP-43*) with the binary Gal4-UAS system. Transgenic expression  
131 of *hTDP-43* in the fly eyes (by a GMR-Gal4 driver) caused age-dependent degeneration, evident  
132 by rough surface, loss of pigment cells and swelling of the compound fly eyes (Figure 1A-D;  
133 Figure S1A-B).

134 In the screen, two transgenic fly lines (#28531 and #38375) showed suppression of  
135 *hTDP-43*-induced eye degeneration (Figure 1E-1F and Figure S1C-S1D), which turned out to be  
136 two independent RNAi lines of the fly gene *CHMP2B*. Further examination revealed that  
137 downregulation of *CHMP2B* with an inducible pan-neuronal *elav*-GeneSwitch (*elavGS*) driver  
138 markedly mitigated *hTDP-43*-induced climbing deficits during aging (Figure 1G; Figure S1E).  
139 Moreover, expression of *hTDP-43* in the adult fly neurons shortened the lifespan by 20.7%  
140 (median life, from  $57.9 \pm 1.2$  d to  $45.9 \pm 1.1$  d), while KD of *CHMP2B* increased the lifespan of  
141 the TDP-43 flies by 14.4% (median life, from  $45.9 \pm 1.1$  d to  $52.5 \pm 0.8$  d) (Figure 1H). The other  
142 RNAi-*CHMP2B* transgenic fly line also partially rescued the shortened lifespan of the TDP-43  
143 flies though to a lesser extent (Figure S1F). Of note, KD of *CHMP2B* did not increase the  
144 climbing capability or lifespan of control flies (Figure S1G-H), indicating that downregulation of  
145 *CHMP2B* did not have a general beneficial effect; rather, it specifically modified  
146 TDP-43-mediated neurodegeneration in flies.

147

### 148 KD of *CHMP2B* decreases TDP-43 phosphorylation levels and cytotoxicity in flies and 149 mammalian cells

150 We then set out to probe for the molecular mechanism underlying the modifying effects of  
151 *CHMP2B* on TDP-43 neurotoxicity. Since TDP-43 plays a vital role in regulating RNA  
152 metabolism and protein homostasis (Cohen et al., 2011; Lee et al. 2012), it would be reasonable

153 to hypothesize that TDP-43 might affect *CHMP2B* mRNA levels and thus correction of this  
154 alteration by RNAi-*CHMP2B* could rescue the phenotypes of TDP-43 flies. However, real-time  
155 quantitative PCR (qPCR) analysis of the fly heads did not show a significant alteration of the  
156 mRNA levels of *CHMP2B* (Figure 1I). Then, the alternative hypothesis was that CHMP2B might  
157 regulate TDP-43 instead. Considering the known function of CHMP2B and ESCRT in autophagy  
158 and protein turnover in cells, we examined the protein abundance of TDP-43 in the  
159 RNAi-*CHMP2B* flies by western blotting. Again, no significant change of TDP-43 levels was  
160 detected (Figure 1J, 1L). Unexpectedly, the phosphorylation of TDP-43 at S409/410 (pS409/410),  
161 a disease hallmark of TDP-43 pathology (Hasegawa et al., 2008; Neumann et al., 2009), was  
162 significantly decreased (Figure 1J-1K).

163 We then extended our study to mammalian cells. First, we confirmed that TDP-43 OE did not  
164 alter CHMP2B mRNA or protein levels in human 293T cells (Figure S2A-S2C). Next, to test  
165 whether CHMP2B modulated TDP-43 levels, we downregulated CHMP2B by small interference  
166 RNA (siRNA). Consistent with the fly data, KD of CHMP2B decreased pTDP-43 levels without  
167 significantly affecting TDP-43 protein abundance in mammalian cells (Figure 1M-O). siRNA of  
168 CHMP2B (siCHMP2B) also reduced the presence of TDP-43 in the detergent-insoluble protein  
169 fraction (Figure 1P-Q), which was consistent with the previous reports that pTDP-43 showed  
170 decreased solubility (Nonaka et al., 2016; Yamashita et al., 2016). More importantly, we  
171 examined the cell viability using a Cell Counting Kit-8 (CCK8) assay, which confirmed that KD of  
172 CHMP2B significantly suppressed TDP-43 OE-induced cytotoxicity in human cells (Figure 1R).

173

#### 174 **OE of CHMP2B or CHMP2B<sup>intron5</sup> promotes pathological alterations of TDP-43 biochemical** 175 **properties**

176 Next, we examined how upregulation of CHMP2B or expression of the disease-causing mutation  
177 CHMP2B<sup>intron5</sup> impacted on TDP-43 in 293T cells. We showed that OE of CHMP2B increased  
178 TDP-43-mediated cytotoxicity, and co-transfection of CHMP2B<sup>intron5</sup> drastically enhanced the loss  
179 of cell viability (Fig. 2A). Western blot analyses indicated that pTDP-43 levels of both



180 endogenous (Figure 2B-2D) and transiently expressed TDP-43 (Figure 2E-2G) were  
181 substantially increased by co-expression of CHMP2B or CHMP2B<sup>intron5</sup>. Furthermore, although  
182 the protein levels of RIPA-soluble TDP-43 were largely unchanged, there was a dramatic  
183 increase of the insoluble fractions of TDP-43 protein when CHMP2B or CHMP2B<sup>intron5</sup> was  
184 co-expressed (Figure 2H-2I).

185 Cytoplasmic mislocalization of TDP-43 is a common feature of TDP-43 pathology and is  
186 thought to be associated with its hyperphosphorylation (Lee et al., 2012; Nonaka et al., 2016).  
187 We then conducted immunocytochemistry analysis to examine whether CHMP2B affected the  
188 subcellular distribution of TDP-43. In normal cells, TDP-43 was predominantly nuclear (Figure  
189 2J). Co-expression of CHMP2B (Figure 2K) or CHMP2B<sup>intron5</sup> (Figure 2L) caused significant  
190 cytoplasmic translocation and/or accumulation of TDP-43, as more cells showed cytoplasmic  
191 TDP-43 (Figure 2M). Together, these results indicated that increase of CHMP2B levels in cells,  
192 by OE of either wildtype (WT) CHMP2B or CHMP2B<sup>intron5</sup>, promoted the cytotoxicity as well as  
193 several key pathological alterations of TDP-43, including increased phosphorylation levels,  
194 insolubility and abnormal cytoplasmic localization.

195

### 196 **The autophagy-lysosomal pathway may not mediate the modifying effects of CHMP2B on** 197 **TDP-43 phosphorylation**

198 CHMP2B and the ESCRT complex play an important role in autophagy and endolysosomal  
199 pathways, and the CHMP2B<sup>intron5</sup> mutation was associated with accumulation of  
200 autophagosomes in cells (Lee et al., 2007). We thus hypothesized that dysfunction of the  
201 autophagy-lysosomal pathway by CHMP2B mutations might account for the increased  
202 phosphorylation levels and the other biochemical alterations of TDP-43. To test the hypothesis,  
203 we examined the levels of autophagy markers including the microtubule-associated protein light  
204 chain 3 (LC3)-II and P62. LC3-II is formed by conjugating with phosphatidylethanolamine during  
205 autophagy when autophagosomes engulf cytoplasmic components (Kabeya et al., 2000); P62 is  
206 a substrate preferentially degraded by autophagy and thus its levels are often used as an

207 indication of the function of autophagic-lysosomal proteolysis (Bjørkøy et al., 2005). We found  
208 that both KD and OE of CHMP2B increased the autophagy marker LC3-II protein levels (Fig.  
209 3A-3B, 3D-3E), while KD of CHMP2B also increased another autophagy protein P62 (Fig. 3A, 3C,  
210 3D, 3F), indicating that both down and up-regulation of CHMP2B led to autophagy-lysosomal  
211 dysfunction. Moreover, expression of the FTD3-associated CHMP2B<sup>Intron5</sup> mutation caused a  
212 drastic increase of both LC3-II and P62 proteins, which was consistent with the previous report  
213 that CHMP2B<sup>Intron5</sup> mutation disrupted autophagic flux (Lee et al., 2007).

214 To test if autophagy dysfunction underlied the modifying effect of CHMP2B on TDP-43  
215 phosphorylation states, we set out to determine how disturbance of the autophagy-lysosomal  
216 pathway impacted on pTDP-43 levels. To do this, we treated cells with several commonly used  
217 autophagy inducers and inhibitors, including rapamycin (a well studied mTOR inhibitor that  
218 activates autophagy), chloroquine (which inhibits both fusion of autophagosomes with lysosomes  
219 and lysosomal protein degradation), and wortmannin (an irreversible inhibitor of  
220 phosphatidylinositol 3-kinase (PI3K) whose activation is required for autophagy initiation)  
221 (Klionsky et al., 2016). We showed that activation of autophagy with rapamycin led to an  
222 increase of LC3-II but not P62 levels (Figure 3G-3I), which mimicked the effect of siCHMP2B  
223 (Figure 3A-3C); inhibition of the autophagy-lysosomal degradation by chloroquine led to the  
224 accumulation of both LC3-II and P62 (Figure 3K-3M), which mimicked the effect of OE of  
225 CHMP2B and CHMP2B<sup>Intron5</sup> (Figure 3D-3F). In addition, the use of wortmannin potently inhibited  
226 autophagy, evident by a substantial decrease in both LC3-II and P62 levels (Figure 3O-3Q).  
227 Unexpectedly, however, in none of the above tests did we detect a significant change of  
228 pTDP-43 levels (Figure 3G-3R). Thus, it was unlikely that CHMP2B modulated TDP-43  
229 phosphorylation states via the autophagy-lysosomal pathway.

230

### 231 **CK1 is involved in the regulation of TDP-43 phosphorylation and cytotoxicity by CHMP2B**

232 To seek for the alternative mechanism that mediated the modifying effect of CHMP2B on TDP-43  
233 phosphorylation, next we focused on the protein kinase CK1, which was previously

234 demonstrated to phosphorylate TDP-43 *in vitro* (Hasegawa et al., 2008; Kametani et al., 2009)  
235 and its inhibitors may be of therapeutic potentials for treating FTD and ALS (Salado et al., 2014;  
236 Alquezar et al., 2016; Martinez-Gonzalez et al., 2020). In this study, we showed that CK1 such  
237 as CK1 $\alpha$  and CK1 $\delta$  could interact with TDP-43 in cells (Figure S3). And, OE of CK1 $\alpha$  or CK1 $\delta$   
238 increased pTDP-43 levels (Figure 4A-4B), and promoted abnormal cytoplasmic localization of  
239 TDP-43 (Figure 4C-4D). More importantly, KD of CK1 $\alpha$  and CK1 $\delta$  by siRNA decreased pTDP-43  
240 levels (Figure 4E-4F) and suppressed the cytotoxicity of TDP-43 (Figure 4G). Of note, due to the  
241 critical role of CK1 in regulating the functions and survival of cells, the amounts of transfection  
242 plasmids (10 ng of CK1 $\alpha$  and 5 ng of CK1 $\delta$ , Figure S4A) and siRNAs (0.8 nM siCK1 $\alpha$  and 0.16  
243 nM si CK1 $\delta$ , Figure S4B) were carefully determined so that OE or KD of of CK1 $\alpha$  and CK1 $\delta$  did  
244 not manifest significant toxicity by themselves in the above and following cell viability assays in  
245 this study.

246 Next, we examined whether manipulation of CK1 levels affected the modifying effects of  
247 CHMP2B on TDP-43 phosphorylation. Indeed, downregulation of CK1 $\alpha$  or CK1 $\delta$  not only  
248 suppressed CHMP2B-induced TDP-43 hyperphosphorylation (Figure 4H-4I) but also partially  
249 rescued the cytotoxicity caused by CHMP2B OE (Figure 4J). Consistently, upregulation of  
250 CK1 $\alpha$  or CK1 $\delta$  abolished the mitigating effects of siCHMP2B on TDP-43 phosphorylation levels  
251 (Figure 4K-4L) and cytotoxicity (Figure 4M). Together, these data indicated that the modulation  
252 of TDP-43 phosphorylation and cytotoxicity by CHMP2B involved the function of CK1.

253

#### 254 **CHMP2B regulates CK1 abundance via the UPS-mediated protein turnover**

255 In the earlier experiments, we noticed that even mild OE or KD of CK1 $\alpha$  or CK1 $\delta$  was sufficient to  
256 alter pTDP-43 levels (10 ng of CK1 $\alpha$  and 5 ng of CK1 $\delta$  in Figure 4H-4I, and 0.8 nM siCK1 $\alpha$  and  
257 0.16 nM si CK1 $\delta$  in Figure 4K-4L; also see Figure S4), suggesting that the protein levels of CK1  
258 were critical in determining TDP-43 phosphorylation states in cells. This prompted us to test  
259 whether CHMP2B had a major regulatory effect on CK1 abundance. OE or KD of CHMP2B did  
260 not significantly change the mRNA levels of CK1 $\alpha$  or CK1 $\delta$  (Figure S5A-S5D). In contrast, the

261 protein levels of CK1 $\alpha$  and CK1 $\delta$  were significantly reduced by KD of CHMP2B (~50% reduction,  
262 Figure 5A-5C), whereas their protein levels were drastically increased by OE of CHMP2B (2~3  
263 folds increase, Figure 5D-5F). Next, we measured the protein turnover rate of CK1 $\alpha$  and CK1 $\delta$   
264 by the pulse-chase assay with cycloheximide (CHX) to inhibit protein translation. We found that  
265 the turnover of CK1 $\alpha$  and CK1 $\delta$  was accelerated by siCHMP2B (Figure 5G-5I) but substantially  
266 impeded by OE of CHMP2B (Figure 5J-5L).

267 Furthermore, we showed that the proteasome inhibitor MG132 but not the  
268 autophagy-lysosome inhibitor chloroquine blocked the turnover of CK1 $\alpha$  and CK1 $\delta$  (Figure  
269 5M-5O), indicating that their turnover relied on the UPS-mediated protein degradation but not the  
270 autophagy pathway. To determine whether CHMP2B regulated the function of the proteasomal  
271 degradation machinery, we conducted an *in vitro* proteasome activity assay. The results showed  
272 that neither OE of WT CHMP2B or CHMP2B<sup>intron5</sup> (Figure S6A) nor KD of CHMP2B (Figure S6B)  
273 significantly affected the proteasomal activity of the cells.

274 Ubiquitination plays an important role in protein degradation, which often serves as a signal  
275 for protein disposal via the UPS or autophagy pathway (Khaminets et al., 2016; Kirkin et al.,  
276 2009). We performed an *in vitro* proteasome activity assay, which indicated that CHMP2B did not  
277 affect the overall proteasomal function in cells (Figure S5). We then tested whether CHMP2B  
278 regulated the ubiquitination levels of CK1 $\alpha$  or CK1 $\delta$ . Indeed, we found that both expression of  
279 the disease-causal mutation CHMP2B<sup>intron5</sup> and increase of WT CHMP2B levels significantly  
280 decreased the ubiquitination levels of CK1 $\alpha$  and CK1 $\delta$  (Figure 5P-5S). Together, these data  
281 indicate that CHMP2B regulates the ubiquitination and turnover of CK1 via the UPS-dependent  
282 protein degradation pathway.

283

#### 284 **CHMP2B protein level is upregulated in the brain of aged mice**

285 Aging is a risk factor for neurodegenerative diseases including ALS and FTD, as the onset of the  
286 diseases and TDP-43 pathology are age-dependent (Niccoli et al., 2017). In particular, pTDP-43  
287 levels are increased in the brain and spinal cord of WT mice during aging (Liu et al., 2015) and

288 the occurrence of individuals with pTDP-43 in the brain increases with age (Riku et al., 2019).  
289 Since our cell culture data indicated that increase of CHMP2B impeded CK1 turnover and  
290 promoted TDP-43 hyperphosphorylation, we wondered whether increase of CHMP2B levels ever  
291 occurred *in vivo* and if aging might have an effect on CHMP2B abundance. Hence, we examined  
292 the protein levels of CHMP2B in young adult (2-month old) and aged mice (10-month old).  
293 Western blot analyses of the mouse central nervous system demonstrated a striking increase in  
294 the protein levels of CHMP2B in the cerebral cortices without the motor cortex (Figure 6A-B),  
295 which covered the human brain counterparts of most of the frontal, the entire temporal and  
296 parietal lobes. In addition, the protein levels of CHMP2B in the hippocampus of aged mice  
297 showed an upward trend with a marginal significance ( $p = 0.056$ ) (Figure 6C-6D). No significant  
298 change in the protein levels of CHMP2B was detected in the mouse motor cortex (Figure 6E-6F)  
299 or the spinal cord (Figure 6G-6H) during aging. Given the importance of the frontal-temporal  
300 lobes and hippocampus in cognitive functions in humans (Burgess et al., 2002; Simons and  
301 Spiers, 2003), these data suggest that the age-dependent increase of CHMP2B abundance  
302 might be a contributing factor in the development of TDP-43 pathology and the onset of the  
303 diseases especially for those associated with dementia.

304

### 305 **Increase of CK1 abolishes the mitigating effect of RNAi-CHMP2B on TDP-43 flies**

306 This study was initiated by the identification of RNAi-CHMP2B as a suppressor of  
307 TDP-43-induced neurodegeneration in a *Drosophila* screen. Finally, we sought to verify that CK1  
308 mediated the modifying effect of CHMP2B on TDP-43 in *in vivo* settings. Previous studies  
309 demonstrated that inhibition of CK1, mainly the  $\delta$  and  $\epsilon$  isoforms, suppressed TDP-43-induced  
310 neurotoxicity in fly and mouse models of ALS and FTD (Alquezar et al., 2016; Hicks et al., 2019;  
311 Martinez-Gonzalez et al., 2020). Here, we showed that OE of *Doubletime (DBT)*, the *Drosophila*  
312 homologue of CK1 $\delta/\epsilon$ , in adult fly neurons enhanced the TDP-43 toxicity, as the longevity of  
313 TDP-43 flies was further shortened (median life, from  $44.3 \pm 2.1$  d to  $39.3 \pm 1.4$  d) (Figure 6I).  
314 More importantly, upregulation of CK1 levels by OE of *dbt* abolished the lifespan-extending effect

315 of RNAi-CHMP2B on TDP-43 flies (median life, from  $50.3 \pm 0.8$  d to  $38.5 \pm 0.5$  d) (Figure 6J).  
316 Together with the data from the cell culture-based experiments (Figures 4 and 5), these findings  
317 indicated a crucial role of CK1 in mediating the modifying effect of CHMP2B on TDP-43  
318 pathogenesis.  
319

## 320 DISCUSSION

321 CHMP2B is a major component of the ESCRT-III complex and the function of the ESCRT  
322 machinery is required for the biogenesis of multivesicular bodies (MVBs). The ESCRT pathway  
323 and the MVBs are not only in charge of sorting and delivering various cellular cargos to vacuoles  
324 and lysosomes for degradation, but also regulate a variety of biological processes such as  
325 retroviral budding, cytokinetic abscission, and the formation and maintenance of synapses  
326 (Henne et al., 2011; Hurley, 2010; Chassefeyre et al., 2015). Rare pathogenic mutations in  
327 *CHMP2B* are associated with ALS and FTD (Skibinski et al., 2005; Parkinson et al., 2006; Cox et  
328 al., 2010). Previous studies of the *CHMP2B* mutations using human cells as well as fly and  
329 mouse models demonstrate a major defect in the autophagic-endolysosomal pathway (Lee et al.,  
330 2007; van der Zee et al., 2008; Ghazi-Noori et al., 2012; Clayton et al., 2015; Vernay et al., 2016;  
331 Clayton et al., 2018;). Also, misregulation in several major signaling pathways such as Toll  
332 (Ahmad et al., 2009), Notch (Cheruiyot et al., 2014), and TGF- $\beta$  and JNK signaling (West et al.,  
333 2015) are associated with mutant *CHMP2B in vivo*. In addition, neuronal expression of *CHMP2B*  
334 mutations such as *CHMP2B*<sup>Intron5</sup> impairs the maturation of dendritic spines (Belly et al., 2010),  
335 causes inclusion formation and axonal degeneration (Ghazi-Noori et al., 2012), and develops  
336 pathological and behavioral features of ALS and FTD (Vernay et al., 2016).

337 In this study, we identify RNAi-*CHMP2B* as a suppressor of hTDP-43-mediated  
338 neurodegeneration in flies, which raised the possibility that its mammalian counterpart is also a  
339 potential modifier of TDP-43. Indeed, we show that manipulation of *CHMP2B* levels by OE or KD  
340 of human *CHMP2B* in 293T cells demonstrates a positive correlation between *CHMP2B* levels  
341 and TDP-43 cytotoxicity. More interestingly, KD of *CHMP2B* reduces whereas OE of WT or  
342 Intron5 *CHMP2B* increases pTDP-43 levels, pointing to a crucial and previously unknown  
343 function of *CHMP2B* in regulating the phosphorylation states of TDP-43. Furthermore, OE of  
344 *CHMP2B* or *CHMP2B*<sup>Intron5</sup> promotes the insolubility and abnormal cytoplasmic localization of  
345 TDP-43. The identification of *CHMP2B* as a modifier of TDP-43 phosphorylation and  
346 proteotoxicity led us to examine whether the autophagy-lysosomal pathway is involved.



347 Surprisingly, this regulation is independent of the autophagy-lysosomal pathway, as inhibition of  
348 the autophagic or lysosomal function does not alter TDP-43 phosphorylation levels.

349 CK1 is a known kinase that phosphorylates TDP-43 *in vitro* (Hasegawa et al., 2008;  
350 Kametani et al., 2009). We provide evidence that CK1 is a molecular link between CHMP2B and  
351 TDP-43, which mediates the modifying effect of CHMP2B on TDP-43 phosphorylation and  
352 proteotoxicity. Our findings further show that CHMP2B controls the abundance of CK1 protein by  
353 regulating the ubiquitination levels and the UPS-dependent turnover of CK1. It is unclear how  
354 exactly CHMP2B regulates the ubiquitination of CK1, which is definitely worth further  
355 investigation in the future. Along the line, it is not completely surprising that the ESCRT complex  
356 also functions in protein ubiquitination. For example, CHMP5, another ESCRT-III component,  
357 has been shown to interact with the deubiquitinase USP8 and regulate the ubiquitination of  
358 proteins in immune cells (Adoro et al., 2017; Son et al., 2019).

359 KD of CK1 $\alpha$  or CK1 $\delta$  can partially rescue the cell viability impaired by CHMP2B OE, while  
360 OE of CK1 $\alpha$  or CK1 $\delta$  abolishes the mitigating effect of KD of CHMP2B in 293T cells, which  
361 suggest that increased cellular CK1 levels are at least in part responsible for CHMP2B-mediated  
362 cytotoxicity. Thus, in addition to autophagy dysfunction and misregulation of the Toll and other  
363 cellular signaling pathways, the CK1-mediated hyperphosphorylation of TDP-43 may be another  
364 key mechanism contributing to the pathogenesis of CHMP2B-related ALS/FTD. Besides, CK1 is  
365 also involved in AD (Ghoshal et al., 1999; Yasojima et al., 2000; Chen et al., 2017) and its  
366 colocalization with CHMP2B is found in granulovacuolar degeneration bodies in AD (Funk et al.,  
367 2011). Given that TDP-43 pathology is present in up to 57% AD cases (McAleese et al., 2017)  
368 and CHMP2B protein levels increase during aging in the mouse brain cortices important for  
369 cognitive function (Figure 6A-6B), it is conceivable that the molecular axis of “CHMP2B–CK1–  
370 TDP-43” (Figure 6K) may play a broader and more fundamental role in the age-dependent onset  
371 and progression of neurodegenerative diseases. And, it will be interesting to determine whether  
372 modulation of CK1 activity may serve as a potential therapeutic target for CHMP2B-related  
373 diseases and dementia.



## 374 **METHODS AND MATERIALS**

### 375 ***Drosophila* strains**

376 The following strains were obtained from the Bloomington *Drosophila* Stock Center (BDSC):  
377 RNAi-*mCherry* (#35785, a control for short hairpin RNAi knockdown), RNAi-*luciferase* (#31603,  
378 a control for long hairpin RNAi knockdown), *elavGS* (#43642), RNAi-*CHMP2B* (#28531) and the  
379 UAS-*dbt* line (#12121). The RNAi-*CHMP2B* (#38375) strain was obtained from the Tsinghua Fly  
380 Center (TFC). For the long hairpin RNAi line of *CHMP2B* (#28531), a copy of UAS-*Dcr2* was  
381 co-expressed to boost the knockdown efficiency (Ni et al., 2007). The UAS-*TDP-43* flies were  
382 described previously (Sun et al., 2018).

383 Flies tested in this study were raised on standard cornmeal media and maintained at 25 °C  
384 and 60% relative humidity. For adult-onset, neuronal expression of the UAS or RNAi transgenes  
385 using the *elavGS* driver (Osterwalder et al., 2001), flies were raised on regular fly food  
386 supplemented with 80 µg/ml RU486 (TCI).

387

### 388 **Fly lifespan and climbing assays**

389 For the lifespan experiment, 20 flies per vial and 5-8 vials per group were tested. Flies were  
390 transferred to fresh fly food every 3 days and the number of dead flies of each vial was recorded.  
391 Flies lost prior to natural death through escape or accidental death were excluded from the final  
392 analysis. The median lifespan was calculated as the mean of the medians of each vial belonging  
393 to the same group, whereas the “50% survival” shown on the survival curves was derived from  
394 compilation of all vials of the group. For the climbing assay, 20 flies were transferred into an  
395 empty polystyrene vial and gently tapped down to the bottom of the vial. The number of flies that  
396 climbed over a distance of 3 cm within 10 seconds was recorded. The test was repeated three  
397 times for each vial and 5-8 vials of each genotype were assessed.

398

### 399 **RNA extraction and real-time quantitative PCR (qPCR)**

400 For qPCR, total RNA was isolated from fly heads or cell culture using TRIzol (Invitrogen)

401 according to the manufacturer's instruction. After DNase (Promega) treatment to remove  
402 genomic DNA, the reverse transcription (RT) reactions were performed using All-in-One cDNA  
403 Synthesis SuperMix kit (Bimake). The cDNA was then used for real-time qPCR using 2x SYBR  
404 Green qPCR Master Mix (Bimake) with the QuantStudio™ 6 Flex Real-Time PCR system (Life  
405 Technologies). The mRNA levels of *actin* or *GAPDH* were used as an internal control to  
406 normalize the mRNA levels of genes of interest. The qPCR primers used in this study are listed  
407 below:

408 *dActin* forward: 5'-GAGCGCGGTTACTCTTTTAC-3'  
409 *dActin* reverse: 5'-GCCATCTCCTGCTCAAAGTC-3'  
410 *dCHMP2B* forward: 5'-GAAAGAAACCCACCGTGAAG-3'  
411 *dCHMP2B* reverse: 5'-TCCTCCTCCTCCATTTTCCT-3'  
412 *hβ-actin* forward: 5'-GTTACAGGAAGTCCCTTGCCATCC-3'  
413 *hβ-actin* reverse: 5'-CACCTCCCCTGTGTGGACTTGGG-3'  
414 *hCHMP2B* forward: 5'-AGATGGCTGGAGCAATGTCT-3'  
415 *hCHMP2B* reverse: 5'-CCTTCTGGAAATTCTGCATTG-3'  
416 *hCK1α* forward: 5'-TAATGGGTATTGGGCGTCAC-3'  
417 *hCK1α* reverse: 5'-TGGTATGTGTTGCCTTGTC-3'  
418 *hCK1δ* forward: 5'-AGCACATCCCCTATCGTGAG-3'  
419 *hCK1δ* reverse: 5'-AGCCCAGAGACTCCAAGTCA-3'

420

#### 421 **Plasmids and siRNAs**

422 The pCAG-hTDP-43-HA plasmid was generated as previously described (Sun et al., 2018). To  
423 generate pCAG-Flag-CHMP2B, pCAG-Flag-CK1α and pCAG-Flag-CK1δ plasmids, DNA  
424 fragments encoding human CHMP2B, CK1α and CK1δ were amplified from  
425 pCMV3-Flag-CHMP2B (Sino Biological Inc. #HG14596-NF), or cDNA from 293T cells or  
426 SH-SY5Y cells by PCR using primers containing the Flag tag sequence. The PCR products were  
427 then sub-cloned into a pCAG vector (Chen et al., 2014) using the XhoI/EcoRI sites. The PCR

428 primers used are listed below:

429 Flag-CHMP2B-F: 5'--CATCATTTTGGCAAAGAATTCGCCACCATGGATTACAAGGAT--3'

430 Flag-CHMP2B-R: 5'--GCTCCCCGGGGGTACCTCGAGTTAATCTACTCCTAA--3'

431 Flag-CK1 $\alpha$ -F:

432 5'--CATCATTTTGGCAAAGAATTCGCCACCATGGATTACAAGGATGACGACGATAAGAT

433 GGCGAGTAGCAGC--3'

434 Flag-CK1 $\alpha$ -R: 5'--GCTCCCCGGGGGTACCTCGAGTTAGAAACCTTTCATGTTAC--3'

435 Flag-CK1 $\delta$ -F:

436 5'--CATCATTTTGGCAAAGAATTCGCCACCATGGATTACAAGGATGACGACGATAAGAT

437 GGAGCTGAGAGTC--3'

438 Flag-CK1 $\delta$ -R: 5'--GCTCCCCGGGGGTACCTCGAGTCATCGGTGCACGAC--3'

439 The expression construct of CHMP2B<sup>Intron5</sup> was generated by homologous recombination.

440 Briefly, the DNA fragment of Flag-CHMP2B<sup>Intron5</sup> was amplified by PCR and inserted into the

441 cloning vector using ClonExpress MultiS One Step Cloning Kit (Vazyme). The construct was

442 then sub-cloned into the pCAG expression vector as above. The PCR primers used in this study:

443 Flag-CHMP2B<sup>Intron5</sup>-F: 5'—CATCATTTTGGCAAAGAATTCGCCACCATGGATTACAAGGAT--3'

444 Flag-CHMP2B<sup>Intron5</sup>-R: 5'--GCTCCCCGGGGGTACCTCGAGTTACACCTTCCAGA--3'

445 The siRNA oligonucleotides to CHMP2B, CK1 $\alpha$  and CK1 $\delta$  were purchased from GenePharma

446 (Shanghai, China), and the sequences of siRNAs are listed below:

447 si-Ctrl (Negative control): ACGUGACACGUUCGGAGAA

448 si-CHMP2B#1: UUUUUACAUCUCCACGG

449 si-CHMP2B#2: AGAUGCACAAGUUGUUUGG

450 si-CHMP2B#3: CAGAUGGUAAGCUUCGAGC

451 si-CK1 $\alpha$ #1: UUCUACUGAUCUUCUGGUC

452 si-CK1 $\alpha$ #2: UAACUGGUUUAAUCCUGAG

453 si-CK1 $\alpha$ #3: UUUCUGCUUUAAUUCUGUC

454 si-CK1 $\delta$ #1: CAUUUGGUCAGCAAGCAGC

455 si-CK1δ#2: UUGUCAAUCCAAGGUGC

456 si-CK1δ#3: AUUUCUGUCUCUUGGUGGC

457

#### 458 **Cell cultures, transfection**

459 293T cells were cultured in Dulbecco's Modified Eagle Medium (Sigma-Aldrich, D0819)  
460 supplemented with 10% (v/v) Fetal Bovine Serum (BioWest) and GlutaMAX™ (Invitrogen) at 37  
461 °C in 5% CO<sub>2</sub>. Transient transfection of siRNA oligonucleotides or plasmids was performed using  
462 Lipofectamine™ RNAiMAX (Invitrogen) in Opti-MEM (Invitrogen), or PolyJet™ In Vitro DNA  
463 Transfection Reagent (SignaGen Laboratories) in DMEM, respectively. Cells were harvested 48  
464 h and 72 h after transfection with plasmids and siRNAs, respectively.

465

#### 466 **Pharmacological experiments**

467 For the pulse-chase assay, CHX was added into the culture medium to a final concentration of  
468 25 ng/ml. For the proteasomal inhibition, MG132 was added to a final concentration of 10 μM.  
469 For the autophagy-lysosome inhibition, chloroquine was added to a final concentration of 10 μM.  
470 The cells were treated with the above drugs for indicated durations and then harvested for the  
471 subsequent Western blotting or immunocytochemistry analysis.

472

#### 473 **Cell viability assay**

474 293T cells were plated in 24-well plates at a density of 200,000 cells/ml, and transfected with  
475 siRNAs or plasmids 12-24 h later. Six to eight hours after transfection, the cells were seeded at  
476 10,000 cells/well into 96-well plates at a volume of 100 μl/well. Cell viability was assessed by  
477 measuring the reduction of WST-8 [2-(2-methoxy-4-nitrophenyl)-3-(4-nitrophenyl)-5-(2,  
478 4-disulfophenyl)-2H-tetrazolium] into formazan using Cell Counting Kit-8 assay (Dojindo) by  
479 adding 10 μl of CCK-8 solution to the cells at specific time points. Thereafter, the cells were  
480 incubated for 2 h at 37 °C before measurement of the OD values at 450 nm. Cell viability was  
481 quantified according to the manufacturer's instructions.

482

### 483 **Antibodies**

484 The following antibodies were used for Western blotting, immunoprecipitation and  
485 immunofluorescence assays: Rabbit anti-phospho TDP-43 (Ser409/Ser410) (Sigma-Aldrich,  
486 SAB4200225), mouse anti-FLAG (Sigma-Aldrich, F3165), mouse anti-Flag (Proteintech,  
487 20543-1-AP), mouse anti-HA (Proteintech, 66006-1), rabbit anti-HA (CST, 3724), rabbit  
488 anti-TDP-43 (Proteintech, 10782-2-AP), mouse anti-TDP-43 (Abcam, ab57105), mouse  
489 anti-P62/SQSTM1 (Proteintech, 66184-1-Ig), rabbit anti-LC3B (Abcam, ab48394), rabbit  
490 anti-CK1 $\alpha$  (Proteintech, 55192-1-AP), chicken anti-CK1 $\alpha$  (Thermo, PA1-10006), rabbit  
491 anti-CK1 $\delta$  (Proteintech, 14388-1-AP), mouse anti-CK1 $\delta$  (Thermo, MA5-17243), rabbit  
492 anti-GAPDH (Bimake, A5028), mouse anti-GAPDH (Proteintech, 60004-1), rabbit anti-Tubulin  
493 (MBL, PM054), mouse anti-actin (Cell Signaling, 3700). HRP conjugated secondary antibodies:  
494 anti-mouse (Sigma-Aldrich, A4416), anti-rabbit (Sigma-Aldrich, A9169) and anti-rat  
495 (Sigma-Aldrich, A9037). Fluorescent secondary antibodies: anti-Rabbit Cy5 (Life Technologies,  
496 A10523), anti-mouse Alexa Fluor<sup>®</sup> 488 (Life Technologies, A11029) and anti-chicken Alexa<sup>®</sup>  
497 Fluor 633 (Sigma-Aldrich, A-21103).

498

### 499 **Protein extraction and Western blotting**

500 Fly heads or cultured cells were lysed in 2% SDS lysis buffer (100 mM Tris-HCl at pH 6.8, 2%  
501 SDS, 40% glycerol, 10%  $\beta$ -mercaptoethanol, 0.04% bromophenol blue) or tissue extraction  
502 reagent I (50 mM Tris, pH 7.4, 250 mM NaCl, 5 mM EDTA, 2 mM Na<sub>3</sub>VO<sub>4</sub>, 1 mM NaF, 20 mM  
503 Na<sub>4</sub>P<sub>2</sub>O<sub>7</sub>, 0.02% NaN<sub>3</sub>) (Invitrogen) containing protease and phosphatase inhibitor cocktails  
504 (Roche, 04693132001). For separation of soluble and insoluble proteins, cells were lysed on ice  
505 using RIPA buffer (50 mM Tris pH 8.0, 150 mM NaCl, 1% NP-40, 5 mM EDTA, 0.5% sodium  
506 deoxycholate, 0.1% SDS) supplemented with protease and phosphatase inhibitors (Roche).  
507 Samples were sonicated and then centrifuged at 13,000 x g for 10 min at 4 °C. The resulting  
508 supernatant was used as the soluble fraction and the pellets containing insoluble fractions were

509 dissolved in a 9M urea buffer (9 M urea, 50 mM Tris buffer, pH 8.0) after wash.

510 All protein samples were boiled at 95 °C for 5 min. Equal mounts of lysates were resolved by  
511 electrophoresis using a 10% Bis-Tris SDS-PAGE (Invitrogen) and probed with the primary and  
512 secondary antibodies listed above. Detection was performed using the High-sig ECL Western  
513 Blotting Substrate (Tanon). Images were captured using an Amersham Imager 600 (GE  
514 Healthcare) and the densitometry was measured using ImageQuant TL Software (GE  
515 Healthcare) and ImageJ. The contrast and brightness were optimized equally in Adobe  
516 Photoshop CS6. Tubulin, GAPDH or Actin was used as a loading control for normalization as  
517 indicated in the figures.

518

### 519 **Immunocytochemistry and confocal imaging**

520 293T cells grown on coverslips pre-coated with PLL (Sigma-Aldrich) in a 24-well plate were  
521 transfected and treated as described above. The cells were fixed in 4% paraformaldehyde in  
522 PBS for 15 min at room temperature, permeabilized with 0.5% Triton X-100 (Sigma-Aldrich) in  
523 PBS for 15 min, and blocked with 3% goat serum in PBST (0.1% Triton X-100 in PBS) for 1 h at  
524 room temperature. The above primary and secondary antibodies in the blocking buffer were then  
525 incubated at 4 °C overnight or at room temperature for 1 h. After 3 washes with PBST, cells were  
526 mounted on glass slides using VECTASHIELD Antifade Mounting Medium with DAPI (Vector  
527 Laboratories).

528 Fluorescent images were taken with Leica TCS SP8 confocal microscopy system using a  
529 63X oil objective (NA=1.4). Images were assembled into figures using Adobe Photoshop CS6.

530

### 531 **Immunoprecipitation**

532 293T cells were lysed in an IP buffer (50mM Tris-HCl PH 7.4, 150mM NaCl, 1% NP-40, 1mM  
533 EDTA, 5% glycerol) containing protease inhibitor cocktails and nethylmaleimide (inhibit  
534 deubiquitination). Following centrifugation at 15000 x g for 15 min at 4 °C, the supernatants were  
535 collected in new vials, and incubated with mouse anti-Flag beads on a rotary shaker at 4 °C

536 overnight. The beads were then collected and eluted in the 2X SDS buffer for the subsequent  
537 Western blotting assay.

538

### 539 ***In vitro* proteasome activity assay**

540 Proteasomal activity was measured using a Proteasome Activity Assay kit (Abcam, ab107921).  
541 293T cells were transfected with indicated plasmids for 48 h and siRNA for 72 h, followed by  
542 trypsin digestion and quantification. The cells were subsequently lysed in 90  $\mu$ l lysis buffer (0.5%  
543 NP40 in PBS), and the lysates were centrifuged at 16000 x g for 15 min at 4 °C and then the  
544 supernatants were collected in new vials. The proteasomal activity of the supernatants was  
545 determined by assaying the cleavage of a fluorogenic peptide substrate Suc-LLVY-AMC  
546 according to the manufacture's instruction. The substrate peptides were incubated with the cell  
547 lysates at 37 °C for 1 h, and the fluorescence intensity was measured at the end of the assay  
548 using a microplate reader (BioTek, Ex/Em = 350/440 nm).

549

### 550 **Statistical analysis**

551 Statistical significance in this study is determined by one-way analysis of variance (ANOVA) with  
552 Tukey's HSD post-hoc test, two-way ANOVA with Bonferroni's post-hoc test, or unpaired,  
553 two-tailed Student's *t*-test with equal variance at \* $p < 0.05$ , \*\* $p < 0.01$ , and \*\*\* $p < 0.001$  as  
554 indicated. Error bars represent the standard error of the mean (SEM).

555 **DECLARATIONS**

556 **Acknowledgements**

557 We thank the BDSC for providing the fly strains, Z. Zhang for the cloning vectors and plasmids, S.  
558 Zhang for technical supports, members of the Fang lab for helpful discussion, and J. Yuan for  
559 comments and critical reading of the manuscript.

560 **Funding**

561 This work is supported by the grants from the National Key R&D Program of China  
562 (2016YFA0501902) to Y.F., the National NSFC (81671254 and 31471017) to Y.F., the SMSTC  
563 Major Project (2019SHZDZX02) to Y.F. and Y.C., and the Outstanding Scholar Program of  
564 Guangzhou Regenerative Medicine and Health Guangdong Laboratory (2018GZR110102002) to  
565 A.L.

566 **Author's contributions**

567 X.S., A.L. and Y.F. conceived the research; X.S., X.D., Y.C. and Y.F. designed the experiments;  
568 X.S., X.D., R.H., Y.D., J.C., J.N. and Q.W. performed the experiments; X.S., X.D., R.H. and Y.D.,  
569 contributed important new reagents; X.S., X.D., K.Z. and Y.F. analyzed the data and interpreted  
570 the results; X.S., X.D. and Y.F. prepared the figures; and X.S., X.D., A.L. and Y.F. wrote the  
571 paper. All authors read and approved the final manuscript.

572 **Competing interests**

573 The authors declare no competing interests.



574 **REFERENCE**

- 575 Adoro, S., Park, K.H., Bettigole, S.E., Lis, R., Shin, H.R., Seo, H., Kim, J.H., Knobeloch, K.P., S  
576 him, J.H., and Glimcher, L.H. Post-translational control of T cell development by the ESCRT  
577 protein CHMP5. *Nat. Immunol.* **18**, 780-790 (2017).
- 578 Ahmad, S.T., Sweeney, S.T., Lee, J.A., Sweeney, N.T., and Gao, F.B. Genetic screen identifies  
579 serpin5 as a regulator of the toll pathway and CHMP2B toxicity associated with  
580 frontotemporal dementia. *Proc. Natl. Acad. Sci. U. S. A.* **106**, 12168-12173 (2009).
- 581 Alquezar, C., Salado, I.G., de la Encarnacion, A., Perez, D.I., Moreno, F., Gil, C., de Munain, A.L.,  
582 Martinez, A., and Martin-Requero, A. Targeting TDP-43 phosphorylation by Casein  
583 Kinase-1delta inhibitors: a novel strategy for the treatment of frontotemporal dementia. *Mol*  
584 *.Neurodegener.* **11**, 36 (2016).
- 585 Arai, T., Mackenzie, I.R.A., Hasegawa, M., Nonaka, T., Niizato, K., Tsuchiya, K., Iritani, S.,  
586 Onaya, M., and Akiyama, H. Phosphorylated TDP-43 in Alzheimer's disease and dementia  
587 with Lewy bodies. *Acta Neuropathol.* **117**, 125–136 (2009).
- 588 Belly, A., Bodon, G., Blot, B., Bouron, A., Sadoul, R., and Goldberg, Y. CHMP2B mutants linked  
589 to frontotemporal dementia impair maturation of dendritic spines. *J. Cell Sci.* **123**, 2943-2954  
590 (2010).
- 591 Bjørkøy, G., Lamark, T., Brech, A., Outzen, H., Perander, M., Overvatn, A., Stenmark, H., and  
592 Johansen, T. p62/SQSTM1 forms protein aggregates degraded by autophagy and has a  
593 protective effect on huntingtin-induced cell death. *J. Cell Biol.* **171**, 603-614 (2005).
- 594 Burgess, N., Maguire, E.A., and O'Keefe, J. The human hippocampus and spatial and episodic  
595 memory. *Neuron* **35**, 625-641 (2002).
- 596 Chang, X.L., Tan, M.S., Tan, L., and Yu, J.T. The Role of TDP-43 in Alzheimer's Disease. *Mol.*  
597 *Neurobiol.* **53**, 3349–3359 (2016).
- 598 Chassefeyre, R., Martinez-Hernandez, J., Bertaso, F., Bouquier, N., Blot, B., Laporte, M.,  
599 Fraboulet, S., Coute, Y., Devoy, A., Isaacs, A.M., *et al.* Regulation of postsynaptic function by  
600 the dementia-related ESCRT-III subunit CHMP2B. *J. Neurosci.* **35**, 3155-3173 (2015).
- 601 Cheong, J.K., and Virshup, D.M. Casein kinase 1: Complexity in the family. *Int. J. Biochem. Cell*  
602 *Biol.* **43**, 465–469 (2011).
- 603 Chen-Plotkin, A.S., Lee, V.M., and Trojanowski, J.Q. TAR DNA-binding protein 43 in  
604 neurodegenerative disease. *Nat. Rev. Neurol.* **6**, 211-220 (2010).
- 605 Chen, C., Gu, J., Basurto-Islas, G., Jin, N., Wu, F., Gong, C.X., Iqbal, K., and Liu, F.  
606 Up-regulation of casein kinase 1epsilon is involved in tau pathogenesis in Alzheimer's  
607 disease. *Sci. Rep.* **7**, 13478 (2017).
- 608 Cheruiyot, A., Lee, J.A., Gao, F.B., and Ahmad, S.T. Expression of mutant CHMP2B, an  
609 ESCRT-III component involved in frontotemporal dementia, causes eye deformities due to  
610 Notch misregulation in *Drosophila*. *FASEB J.* **28**, 667-675 (2014).
- 611 Choksi, D.K., Roy, B., Chatterjee, S., Yusuff, T., Bakhoun, M.F., Sengupta, U., Ambegaokar, S.,

- 612 Kaye, R., and Jackson, G.R. TDP-43 Phosphorylation by casein kinase I epsilon promotes  
613 oligomerization and enhances toxicity in vivo. *Hum. Mol. Genet.* **23**, 1025-1035 (2014a).
- 614 Clayton, E.L., Milioto, C., Muralidharan, B., Norona, F.E., Edgar, J.R., Soriano, A., Jafar-Nejad,  
615 P., Rigo, F., Collinge, J., and Isaacs, A.M. Frontotemporal dementia causative CHMP2B  
616 impairs neuronal endolysosomal traffic-rescue by TMEM106B knockdown. *Brain* **141**,  
617 3428-3442 (2018).
- 618 Clayton, E.L., Mizielinska, S., Edgar, J.R., Nielsen, T.T., Marshall, S., Norona, F.E., Robbins, M.,  
619 Damirji, H., Holm, I.E., Johannsen, P., Nielsen, J. E., Asante, E. A., Collinge, J., Isaacs, A. M.  
620 Frontotemporal dementia caused by CHMP2B mutation is characterised by neuronal  
621 lysosomal storage pathology. *Acta Neuropathol.* **130**, 511-523 (2015).
- 622 Cohen, T.J., Lee, V.M., and Trojanowski, J.Q. TDP-43 functions and pathogenic mechanisms  
623 implicated in TDP-43 proteinopathies. *Trends Mol. Med.* **17**, 659-667 (2011).
- 624 Corcia, P., Couratier, P., Blasco, H., Andres, C.R., Beltran, S., Meininger, V., and Vourc'h, P.  
625 Genetics of amyotrophic lateral sclerosis. *Rev. Neurol.* **173**, 254–262 (2017).
- 626 Cox, L.E., Ferraiuolo, L., Goodall, E.F., Heath, P.R., Higginbottom, A., Mortiboys, H., Hollinger,  
627 H.C., Hartley, J.A., Brockington, A., Burness, C.E., Morrison, K. E., Wharton, S. B., Grierson,  
628 A. J., Ince, P. G., Kirby, J., Shaw, P. J. Mutations in CHMP2B in lower motor neuron  
629 predominant amyotrophic lateral sclerosis (ALS). *PLoS One* **5**, e9872 (2010).
- 630 Cozza, G., and Pinna, L.A. Casein kinases as potential therapeutic targets. *Expert Opin. Ther.*  
631 *Targets* **20**, 319–340 (2016).
- 632 Cruciat, C.M. Casein kinase 1 and Wnt/ $\beta$ -catenin signaling. *Curr. Opin. Cell Biol.* **31**, 46–55  
633 (2014).
- 634 Foulds, P.G., Davidson, Y., Mishra, M., Hobson, D.J., Humphreys, K.M., Taylor, M., Johnson, N.,  
635 Weintraub, S., Akiyama, H., Arai, T., et al. Plasma phosphorylated-TDP-43 protein levels  
636 correlate with brain pathology in frontotemporal lobar degeneration. *Acta Neuropathol.* **118**,  
637 647-658 (2009).
- 638 Funk, K.E., Mrak, R.E., and Kuret, J. Granulovacuolar degeneration (GVD) bodies of Alzheimer's  
639 disease (AD) resemble late-stage autophagic organelles. *Neuropath. Appl. Neuro.* **37**,  
640 295-306 (2011).
- 641 Ghazi-Noori, S., Froud, K.E., Mizielinska, S., Powell, C., Smidak, M., Fernandez de Marco, M.,  
642 O'Malley, C., Farmer, M., Parkinson, N., Fisher, E.M., Asante, E. A., Brandner, S., Collinge,  
643 J., Isaacs, A. M. Progressive neuronal inclusion formation and axonal degeneration in  
644 CHMP2B mutant transgenic mice. *Brain* **135**, 819-832 (2012).
- 645 Ghoshal, N., Smiley, J.F., DeMaggio, A.J., Hoekstra, M.F., Cochran, E.J., Binder, L.I., and Kuret,  
646 J. A new molecular link between the fibrillar and granulovacuolar lesions of Alzheimer's  
647 disease. *Am. J. Pathol.* **155**, 1163-1172 (1999).
- 648 Hasegawa, M., Arai, T., Nonaka, T., Kametani, F., Yoshida, M., Hashizume, Y., Beach, T.G.,  
649 Buratti, E., Baralle, F., Morita, M., Nakano, I., Oda, T., Tsuchiya, K., Akiyama, H.  
650 Phosphorylated TDP-43 in frontotemporal lobar degeneration and amyotrophic lateral

- 651 sclerosis. *Ann. Neurol.* **64**, 60-70 (2008).
- 652 Henne, W.M., Buchkovich, N.J., and Emr, S.D. The ESCRT pathway. *Dev. Cell* **21**, 77-91 (2011).
- 653 Hicks DA, Cross LL, Williamson R, Rattray M. Endoplasmic Reticulum Stress Signalling Induces  
654 Casein Kinase 1-Dependent Formation of Cytosolic TDP-43 Inclusions in Motor Neuron-Like  
655 Cells. *Neurochem. Res.* **45**, 1354-1364 (2020).
- 656 Higashi, S., Iseki, E., Yamamoto, R., Minegishi, M., Hino, H., Fujisawa, K., Togo, T., Katsuse, O.,  
657 Uchikado, H., Furukawa, Y., et al. Concurrence of TDP-43, tau and  $\alpha$ -synuclein pathology in  
658 brains of Alzheimer's disease and dementia with Lewy bodies. *Brain Res.* **1184**, 284–294  
659 (2007).
- 660 Hurley, J.H. The ESCRT complexes. *Crit Rev. Biochem. Mol. Biol.* **45**, 463-487 (2010).
- 661 Isaacs, A.M., Johannsen, P., Holm, I., and Nielsen, J.E. Frontotemporal dementia caused by  
662 CHMP2B mutations. *Curr. Alzheimer Res.* **8**, 246-251 (2011).
- 663 Jiang, J. CK1 in Developmental Signaling: Hedgehog and Wnt. *Curr. Top Dev. Biol.* **123**,  
664 303-324 (2017).
- 665 Ji, A.L., Zhang, X., Chen, W.W., and Huang, W.J. Genetics insight into the amyotrophic lateral  
666 sclerosis/frontotemporal dementia spectrum. *J. Med. Genet.* **54**, 145-154 (2017).
- 667 Kabeya Y, Mizushima N, Ueno T, Yamamoto A, Kirisako T, Noda T et al. LC3, a mammalian  
668 homologue of yeast Apg8p, is localized in autophagosome membranes after  
669 processing. *EMBO J.* **19**, 5720–5728 (2000).
- 670 Kametani, F., Nonaka, T., Suzuki, T., Arai, T., Dohmae, N., Akiyama, H., and Hasegawa, M.  
671 Identification of casein kinase-1 phosphorylation sites on TDP-43. *Biochem. Biophys. Res. Co.*  
672 **382**, 405-409 (2009).
- 673 Khaminets, A., Behl, C., and Dikic, I. Ubiquitin-Dependent And Independent Signals In Selective  
674 Autophagy. *Trends Cell Biol.* **26**, 6-16 (2016).
- 675 Kirkin, V., McEwan, D.G., Novak, I., and Dikic, I. A role for ubiquitin in selective autophagy. *Mol.*  
676 *Cell* **34**, 259-269 (2009).
- 677 Klionsky, D.J., Abdelmohsen, K., Abe, A., Abedin, M.J., et al. Guidelines for the use and  
678 interpretation of assays for monitoring autophagy (3<sup>rd</sup> edition). *Autophagy* **12**, 1-222 (2016).
- 679 Krasniak, C.S., and Ahmad, S.T. The role of CHMP2B(Intron5) in autophagy and frontotemporal  
680 dementia. *Brain Res.* **1649**, 151-157 (2016).
- 681 Lee, E.B., Lee, V.M., and Trojanowski, J.Q. Gains or losses: molecular mechanisms of  
682 TDP43-mediated neurodegeneration. *Nat. Rev. Neurosci.* **13**, 38-50 (2012).
- 683 Lee, J.A., Beigneux, A., Ahmad, S.T., Young, S.G., and Gao, F.B. ESCRT-III dysfunction causes  
684 autophagosome accumulation and neurodegeneration. *Curr. Biol.* **17**, 1561-1567 (2007).
- 685 Liachko, N.F., Guthrie, C.R., and Kraemer, B.C. Phosphorylation Promotes Neurotoxicity in a  
686 *Caenorhabditis elegans* Model of TDP-43 Proteinopathy. *J. Neurosci.* **30**, 16208-16219  
687 (2010).
- 688 Ling, S.C., Polymenidou, M., and Cleveland, D.W. Converging mechanisms in ALS and FTD:

- 689 disrupted RNA and protein homeostasis. *Neuron* **79**, 416-438 (2013).
- 690 Liu, Y., Atkinson, R.A., Fernandez-Martos, C.M., Kirkcaldie, M.T., Cui, H., Vickers, J.C., and King,  
691 A.E. Changes in TDP-43 expression in development, aging, and in the neurofilament light  
692 protein knockout mouse. *Neurobiol. Aging* **36**, 1151-1159 (2015).
- 693 Martinez-Gonzalez, L., Rodriguez-Cueto, C., Cabezudo, D., Bartolome, F., Andres-Benito, P.,  
694 Ferrer, I., Gil, C., Martin-Requero, A., Fernandez-Ruiz, J., Martinez, A., et al. Motor neuron  
695 preservation and decrease of in vivo TDP-43 phosphorylation by protein CK-1delta kinase  
696 inhibitor treatment. *Sci. Rep.* **10**, 4449 (2020).
- 697 McAleese KE, Walker L, Erskine D, Thomas AJ, McKeith IG, Attems J. TDP-43 pathology in  
698 Alzheimer's disease, dementia with Lewy bodies and ageing. *Brain Pathol.* **27**, 472 - 479  
699 (2017)
- 700 Neumann, M., Kwong, L.K., Sampathu, D.M., Trojanowski, J.Q., and Lee, V.M.-Y. TDP-43  
701 Proteinopathy in Frontotemporal Lobar Degeneration and Amyotrophic Lateral Sclerosis.  
702 *Arch. Neurol.* **64**, 1388-1394 (2007).
- 703 Neumann, M., Kwong, L.K., Lee, E.B., Kremmer, E., Flatley, A., Xu, Y., Forman, M.S., Troost, D.,  
704 Kretschmar, H.A., Trojanowski, J.Q., et al. Phosphorylation of S409/410 of TDP-43 is a  
705 consistent feature in all sporadic and familial forms of TDP-43 proteinopathies. *Acta*  
706 *Neuropathol.* **117**, 137–149 (2009).
- 707 Ni, J.-Q., Markstein, M., Binari, R., Pfeiffer, B., Liu, L.-P., Villalta, C., Booker, M., Perkins, L., and  
708 Perrimon, N. Vector and parameters for targeted transgenic RNA interference in *Drosophila*  
709 *melanogaster*. *Nat. Methods* **5**, 49 (2007).
- 710 Niccoli, T., Partridge, L., and Isaacs, A.M. Ageing as a risk factor for ALS/FTD. *Hum. Mol. Genet.*  
711 **26**, R105-R113 (2017).
- 712 Nonaka, T., Suzuki, G., Tanaka, Y., Kametani, F., Hirai, S., Okado, H., Miyashita, T., Saitoe, M.,  
713 Akiyama, H., Masai, H., Hasegawa, M., Phosphorylation of TAR DNA-binding Protein of 43  
714 kDa (TDP-43) by Truncated Casein Kinase 1delta Triggers Mislocalization and Accumulation  
715 of TDP-43. *J. Biol. Chem.* **291**, 5473-5483 (2016).
- 716 Osterwalder, T., Yoon, K.S., White, B.H., and Keshishian, H. A conditional tissue-specific  
717 transgene expression system using inducible GAL4. *Proc. Natl. Acad. Sci. U. S. A.* **98**,  
718 12596-12601 (2001).
- 719 Parkinson, N., Ince, P.G., Smith, M.O., Highley, R., Skibinski, G., Andersen, P.M., Morrison, K.E.,  
720 Pall, H.S., Hardiman, O., Collinge, J., Shaw, P. J., Fisher, E. M. ALS phenotypes with  
721 mutations in CHMP2B (charged multivesicular body protein 2B). *Neurology* **67**, 1074-1077.  
722 (2006).
- 723 Perez, P., Dray, A., Moore, D., Dietze, P., Bammer, G., Jenkinson, R., Siokou, C., Green, R.,  
724 Hudson, S.L., and Maher, L. SimAmph: an agent-based simulation model for exploring the  
725 use of psychostimulants and related harm amongst young Australians. *Int. J. Drug Policy* **23**,  
726 62-71 (2012).
- 727 Pottier, C., Ravenscroft, T.A., Sanchez - Contreras, M. and Rademakers, R. Genetics of FTL D:

- 728 overview and what else we can expect from genetic studies. *J. Neurochem.* **138**, 32-53  
729 (2016),
- 730 Riku, Y., Duyckaerts, C., Boluda, S., Plu, I., Le Ber, I., Millecamps, S., Salachas, F., Brainbank  
731 Neuro, C.E.B.N.N., Yoshida, M., Ando, T., et al. Increased prevalence of granulovacuolar  
732 degeneration in C9orf72 mutation. *Acta Neuropathol.* **138**, 783-793 (2019).
- 733 Salado, I.G., Redondo, M., Bello, M.L., Perez, C., Liachko, N.F., Kraemer, B.C., Miguel, L.,  
734 Lecourtois, M., Gil, C., Martinez, A., et al. Protein Kinase CK-1 Inhibitors As New Potential  
735 Drugs for Amyotrophic Lateral Sclerosis. *J. Med. Chem.* **57**, 2755-2772 (2014).
- 736 Simons, J.S., and Spiers, H.J. Prefrontal and medial temporal lobe interactions in long-term  
737 memory. *Nat. Rev. Neurosci.* **4**, 637-648 (2003).
- 738 Skibinski, G., Parkinson, N.J., Brown, J.M., Chakrabarti, L., Lloyd, S.L., Hummerich, H., Nielsen,  
739 J.E., Hodges, J.R., Spillantini, M.G., Thusgaard, T., et al. Mutations in the endosomal  
740 ESCRTIII-complex subunit CHMP2B in frontotemporal dementia. *Nat. Genet.* **37**, 806-808  
741 (2005).
- 742 Son, F., Umphred-Wilson, K., Shim, J.H., and Adoro, S. Assessment of ESCRT Protein CHMP5  
743 Activity on Client Protein Ubiquitination by Immunoprecipitation and Western Blotting.  
744 *Methods Mol. Biol.* **1998**, 219-226 (2019).
- 745 Sun, X., Duan, Y., Qin, C., Li, J.C., Duan, G., Deng, X., Ni, J., Cao, X., Xiang, K., Tian, K., et al.  
746 Distinct multilevel misregulations of Parkin and PINK1 revealed in cell and animal models of  
747 TDP-43 proteinopathy. *Cell Death Dis.* **9**, 953 (2018).
- 748 Tan, R.H., Ke, Y.D., Ittner, L.M., and Halliday, G.M. ALS/FTLD: experimental models and reality.  
749 *Acta Neuropathol.* **133**, 177-196 (2017).
- 750 Toyoshima, Y., and Takahashi, H. TDP-43 pathology in polyglutamine diseases: With reference  
751 to amyotrophic lateral sclerosis. *Neuropathology* **34**, 77-82 (2014).
- 752 Urwin, H., Ghazi-Noori, S., Collinge, J., and Isaacs, A. The role of CHMP2B in frontotemporal  
753 dementia. *Biochem. Soc. T.* **37**, 208-212 (2009).
- 754 Urwin, H., Authier, A., Nielsen, J.E., Metcalf, D., Powell, C., Froud, K., Malcolm, D.S., Holm, I.,  
755 Johannsen, P., Brown, J., et al. Disruption of endocytic trafficking in frontotemporal dementia  
756 with CHMP2B mutations. *Hum. Mol. Genet.* **19**, 2228-2238 (2010).
- 757 van der Zee, J., Urwin, H., Engelborghs, S., Bruyland, M., Vandenberghe, R., Dermaut, B., De  
758 Pooter, T., Peeters, K., Santens, P., De Deyn, P.P., et al. CHMP2B C-truncating mutations in  
759 frontotemporal lobar degeneration are associated with an aberrant endosomal phenotype in  
760 vitro. *Hum. Mol. Genet.* **17**, 313-322 (2008).
- 761 Vernay, A., Therreau, L., Blot, B., Risson, V., Dirrig-Grosch, S., Waegaert, R., Lequeu, T., Sellal,  
762 F., Schaeffer, L., Sadoul, R., Loeffler, J. P., René, F. A transgenic mouse expressing  
763 CHMP2B<sup>intron5</sup> mutant in neurons develops histological and behavioural features of  
764 amyotrophic lateral sclerosis and frontotemporal dementia. *Hum. Mol. Genet.* **25**, 3341-3360  
765 (2016).

- 766 West, R.J., Lu, Y., Marie, B., Gao, F.B., and Sweeney, S.T. Rab8, POSH, and TAK1 regulate  
767 synaptic growth in a Drosophila model of frontotemporal dementia. *J. Cell Biol.* **208**, 931-947  
768 (2015).
- 769 Yamashita, T., Teramoto, S., and Kwak, S. Phosphorylated TDP-43 becomes resistant to  
770 cleavage by calpain: A regulatory role for phosphorylation in TDP-43 pathology of ALS/FTLD.  
771 *Neurosci. Res.* **107**, 63-69 (2016).
- 772 Yasojima, K., Kuret, J., DeMaggio, A.J., McGeer, E., and McGeer, P.L. Casein kinase 1 delta  
773 mRNA is upregulated in Alzheimer disease brain. *Brain Res.* **865**, 116-120 (2000).
- 774 Zhang, Y.J., Gendron, T.F., Xu, Y.F., Ko, L.W., Yen, S.H., and Petrucelli, L. Phosphorylation  
775 regulates proteasomal-mediated degradation and solubility of TAR DNA binding protein-43  
776 C-terminal fragments. *Mol. Neurodegener.* **5**, 33 (2010).



777 **FIGURE LEGENDS**

778 **Figure 1. Identification of RNAi-CHMP2B as a suppressor of TDP-43-mediated cytotoxicity**  
779 **in *Drosophila* and mammalian cells.**

780 **(A-F)** Representative z-stack images of the fly eyes expressing the indicated transgenes (by  
781 GMR-Gal4) at Day 10 or Day 20. The average degeneration score (mean  $\pm$  SEM) and the  
782 statistical significance compared to the UAS-*lacZ* control (Ctrl) line are indicated at the bottom of  
783 each group. **(G)** The climbing capability of the flies expressing the indicated transgenes in adult  
784 neurons (by *elavGS*) is evaluated as the average percentage of flies that climb over 3 cm in 10  
785 seconds. **(H)** Lifespan assays of the flies with adult-onset, neuronal expression (by *elavGS*) of  
786 the transgenes as indicated. The numbers of flies tested in each group are indicated. The  
787 RNAi-*Luciferase* fly line is used as a control (RNAi-Ctrl). **(I)** qPCR analysis of the mRNA levels of  
788 *CHMP2B* in the heads of TDP-43 flies. The mRNA levels are normalized to *actin* and shown as  
789 average percentage to that of the UAS-*lacZ* (Ctrl) group. **(J-L)** Representative images (J) and  
790 quantifications (K-L) of the Western blot analysis of the levels of S409/410 pTDP-43 (K) or total  
791 TDP-43 protein (L) in the fly heads. The protein levels are normalized to Tubulin and shown as  
792 percentage to the control group. **(M-O)** Representative images (M) and quantifications (N-O) of  
793 the Western blot analysis of pTDP-43 levels (N) or total TDP-43-HA protein levels (O) in 293T  
794 cells. **(P-Q)** Representative western blot images (P) and quantification (Q) of TDP-43-HA  
795 proteins in the soluble (S, supernatants in RIPA) and insoluble fractions (I, pellets resuspended  
796 in 9 M of urea) of 293T cell lysates. All protein levels are normalized to Actin in the soluble  
797 fractions. **(R)** The viability of 293T cells transfected with the empty vector or TDP-43-HA together  
798 with scrambled siRNA (siCtrl) or siRNA against CHMP2B (siCHMP2B) is assessed using the  
799 CCK-8 assay. Mean  $\pm$  SEM, n = ~10 eyes each group in (A-F), ~20 flies/vial and ~10 vials/group  
800 in (G), and 3 in (I, K-L, N-O, Q-R). Statistical significance was determined by Student's *t*-test  
801 (A-G, I, K-L, M-N, R) and two-way ANOVA (H) at \**p* < 0.05, \*\**p* < 0.01 and \*\*\**p* < 0.001; ns, not  
802 significant. Scale bar: 100  $\mu$ m.

803

804 **Figure 2. OE of CHMP2B or CHMP2B<sup>Intron5</sup> promotes TDP-43 cytotoxicity, phosphorylation,**  
805 **insolubility and cytoplasmic localization.**

806 **(A)** Co-transfection of WT or Intron5 CHMP2B enhances TDP-43-induced reduction of cell  
807 viability in 293T cells. **(B-G)** Representative Western blot images (B, E) and quantifications (C-D,  
808 F-G) of the phosphorylation levels and protein abundance of endogenous TDP-43 (enTDP-43)  
809 (B-D) or transiently expressed TDP-43-HA (E-G) in 293T cells. ud, undetected. **(H-I)**  
810 Representative Western blot images (H) and quantifications (I) of TDP-43 protein in the soluble  
811 (S, supernatants in RIPA) and insoluble fractions (I, pellets resuspended in 9 M of urea) of 293T  
812 cell lysates. Cells transfected with the empty vector are used as a control. All protein levels are  
813 normalized to GAPDH in the soluble fractions. **(J-M)** Representative images (J-L) and  
814 quantification (M) of the immunocytochemistry analyses of TDP-43 subcellular distribution in  
815 293T cells co-transfected with WT or Intron5 CHMP2B as indicated. Mean  $\pm$  SEM, n = 3  
816 replicates in (A, C-D, F-G, I) and ~200 cells each group of pooled results from 3 independent  
817 repeats in (M). \* $p < 0.05$ , \*\* $p < 0.01$ , \*\*\* $p < 0.001$ ; one-way ANOVA; ud, undetectable. Scale bar:  
818 10  $\mu$ m.

819  
820 **Figure 3. CHMP2B regulates autophagy but autophagic-lysosomal dysfunction does not**  
821 **affect pTDP-43 levels.**

822 **(A-F)** Representative images (A, D) and quantifications (B-C, E-F) of Western blot analyses of  
823 293T cells treated with siCHMP2B (A-C) or OE of WT CHMP2B or CHMP2B<sup>Intron5</sup> (D-F).  
824 Scrambled siRNA is used as a control (siCtrl). **(G-R)** Cells transiently expressing TDP-43-HA  
825 were treated with rapamycin (Rapa, 100 nM, 1 h) (G-J), chloroquine (CQ, 10  $\mu$ M, 12 h) (K-N), or  
826 wortmannin (Wort, 50 nM, 1 h) and analyzed by Western blotting. Vehicle (Veh) controls: DMSO  
827 for Rapa and Wort, and PBS for CQ. Mean  $\pm$  SEM, n = 3~4 independent repeats in (B-C, E-F,  
828 H-J, L-N, P-R). \* $p < 0.05$ , \*\* $p < 0.01$ , \*\*\* $p < 0.001$ ; Student's *t*-test except for (E-F, one-way  
829 ANOVA).

830



831 **Figure 4. CK1 mediates CHMP2B-induced TDP-43 hyperphosphorylation and cytotoxicity.**  
832 **(A-B)** Representative images (A) and quantifications (B) of Western blot analysis of the  
833 phosphorylation levels of endogenous TDP-43 (enTDP-43) in 293T cells transiently transfected  
834 of Flag-CK1 $\alpha$  or Flag-CK1 $\delta$ . **(C-D)** Representative confocal images (C) and quantifications (D)  
835 of subcellular localization of TDP-43-HA in cells co-transfected with Flag-CK1 $\alpha$  or Flag-CK1 $\delta$ .  
836 **(E-F)** Representative Western blot images (E) and quantifications (F) of the phosphorylation  
837 levels of TDP-43-HA in 293T cells treated with siCK1 $\alpha$  or siCK1 $\delta$ . **(G)** The cell viability assay  
838 indicates KD of CK1 suppresses the cytotoxicity of TDP-43. **(H-I)** CHMP2B OE-induced  
839 hyperphosphorylation of endogenous TDP-43 can be rescued by siCK1 $\alpha$  or siCK1 $\delta$ . **(J)** siCK1 $\alpha$   
840 or siCK1 $\delta$  suppresses CHMP2B OE-induced cytotoxicity. **(K-L)** Reduction of pTDP-43 levels by  
841 siCHMP2B is abolished by OE of CK1 $\alpha$  or CK1 $\delta$ . **(M)** OE of CK1 $\alpha$  or CK1 $\delta$  significantly  
842 diminishes the mitigating effect of siCHMP2B on TDP-43-mediated cytotoxicity. Of note, the  
843 amount of the transfection plasmids and siRNAs of CK1 $\alpha$  and CK1 $\delta$  is used at the minimal  
844 sufficiency as indicated to avoid the cytotoxic of OE or KD of CK1 by itself (also see Figure S3).  
845 Cells transfected with the empty vector (Vec) or scrambled siRNA (siCtrl) are used as the  
846 controls in the above assays. Mean  $\pm$  SEM, n = 3~4 in (B, F, G, I, J, L, M) and ~200 cells each  
847 group of pooled results from 3 independent repeats in (D). \* $p$  < 0.05, \*\* $p$  < 0.01, \*\*\* $p$  < 0.001;  
848 one-way ANOVA; ud, undetectable. Scale bar: 10  $\mu$ m.

849

850 **Figure 5. CHMP2B regulates UPS-mediated turnover of CK1 $\alpha$  and CK1 $\delta$ .**

851 **(A-F)** KD of CHMP2B (A-C) reduces whereas OE of CHMP2B (D-F) increases the protein  
852 abundance of CK1 $\alpha$  and CK1 $\delta$ . **(G-L)** The protein turnover rates of CK1 $\alpha$  and CK1 $\delta$  in 293T cells  
853 with CHMP2B KD (G-I) or OE (J-L) are assessed by the pulse chase assay. The time (h) after  
854 the cycloheximide (CHX) treatment is indicated. All proteins are normalized to Tubulin and the  
855 relative levels at 0 h of each group are set to 100%. **(M-O)** The proteasome inhibitor MG132 (10  
856  $\mu$ M) but not the autophagy-lysosome blocker CQ (10  $\mu$ M) significantly suppresses the turnover of  
857 CK1 $\alpha$  and CK1 $\delta$ . DMSO is used as a vehicle control. All proteins are normalized to GAPDH and

858 the relative levels at 0 h of each group are set to 100%. **(P-S)** Cells expressing HA-Ubiquitin  
859 (HA-Ub) and Flag-tagged CK1 $\alpha$  (P, R) or CK1 $\delta$  (Q, S) are co-transfected with WT or Intron5  
860 CHMP2B as indicated. The Flag-CK1 $\alpha$  and Flag-CK1 $\delta$  proteins are then immunoprecipitated  
861 with anti-Flag and the ubiquitination levels are examined with anti-HA by Western blotting. Mean  
862  $\pm$  SEM, n = 4; \* $p$  < 0.05, \*\* $p$  < 0.01, \*\*\* $p$  < 0.001; ns, not significant. Student's *t*-test (B-C, E-F),  
863 two-way ANOVA (H-I, K-L, N-O), one-way ANOVA (R-S).

864

865 **Figure 6. The protein abundance of CHMP2B in various regions of the mouse CNS during**  
866 **aging.**

867 The protein levels of CHMP2B in the non-motor cerebral cortices **(A-B)**, the hippocampus **(C-D)**,  
868 the motor cortex **(E-F)** and the spinal cord **(G-H)** of young (2-month) and aged (10-month) mice  
869 are analyzed by Western blotting. n = 4 mice per group. **(I-J)** Lifespan assays of the flies with  
870 adult-onset, neuronal expression (by *elavGS*) of the transgenes as indicated. The numbers of  
871 flies tested in each group are indicated. The UAS-*lacZ* flies are used as a UAS control. Mean  $\pm$   
872 SEM; \* $p$  < 0.05, \*\* $p$  < 0.01, \*\*\* $p$  < 0.001; ns, not significant; Student's *t*-test (B, D, F, H) and  
873 two-way ANOVA (I-J). **(K)** A schematic model of the “CHMP2B–CK1–TDP-43” pathogenic axis.  
874 In addition to the function in the autophagic-endolysosomal pathway, we discover in this study  
875 that CHMP2B modulates the ubiquitination levels and the protein turnover of CK1 via the  
876 UPS-dependent pathway. In particular, the disease causal mutation CHMP2B<sup>Intron5</sup> or increased  
877 levels of CHMP2B with age may reduce CK1 turnover and increase its protein abundance, which  
878 promotes TDP-43 hyperphosphorylation, leading to increased insolubility, cytoplasmic  
879 mislocalization and proteotoxicity of TDP-43. Together, CK1-mediated TDP-43  
880 hyperphosphorylation may contribute to the pathogenesis of CHMP2B-related ALS/FTD and  
881 other diseases. Future studies are required to examine how CHMP2B regulates the  
882 ubiquitination of CK1 and whether the relationship between CHMP2B and pTDP-43 exists in  
883 mammalian models *in vivo*, potentially expanding the therapeutic relevance of these findings.

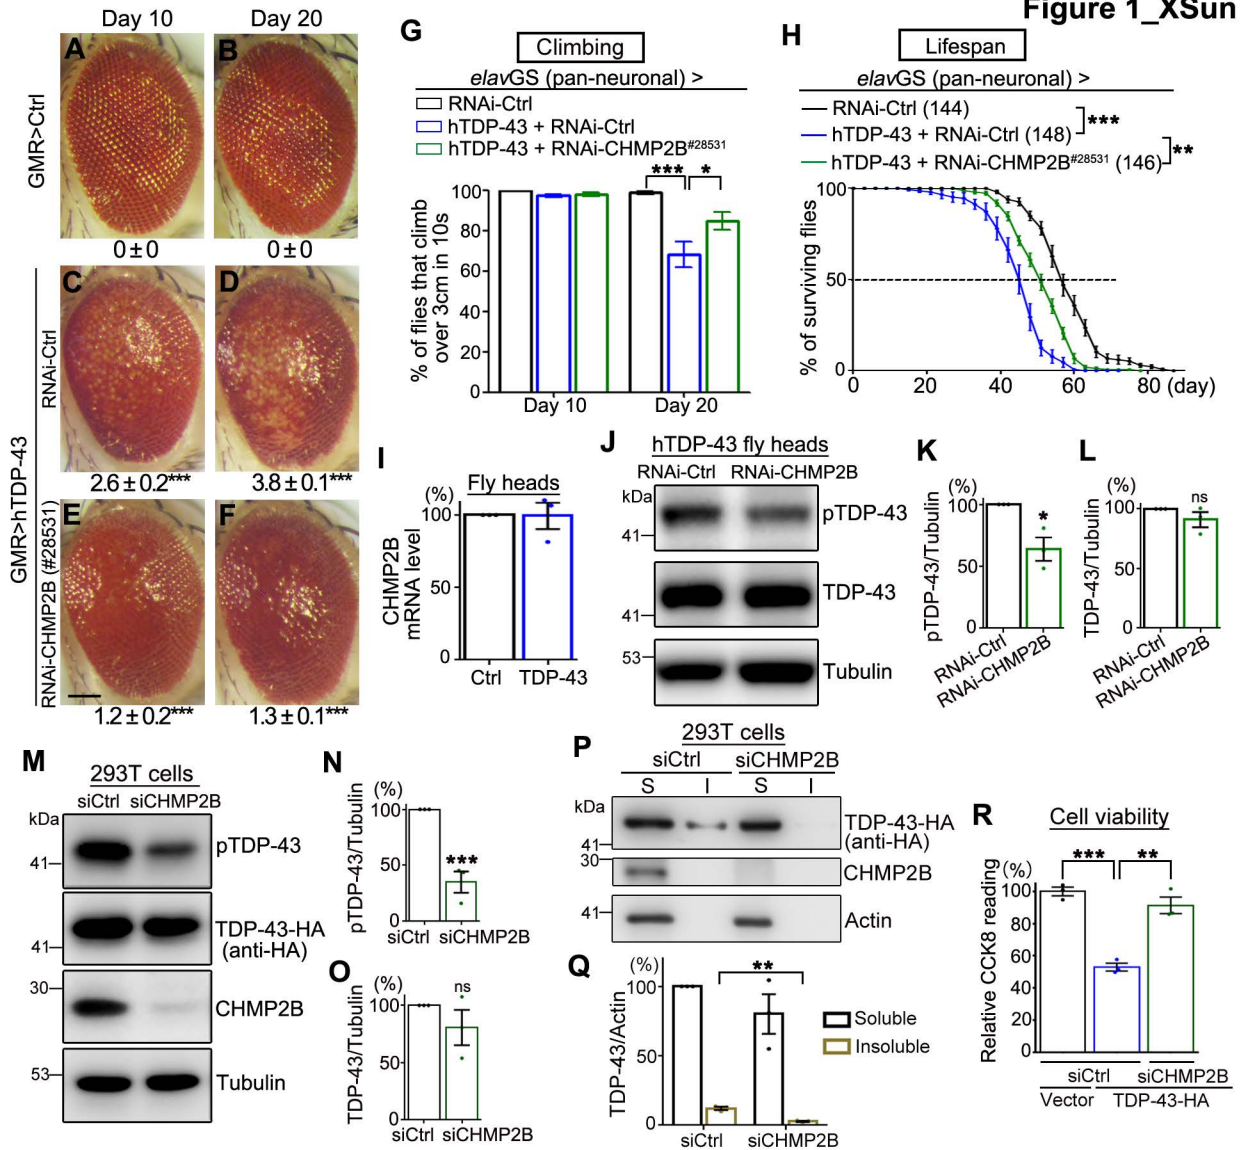

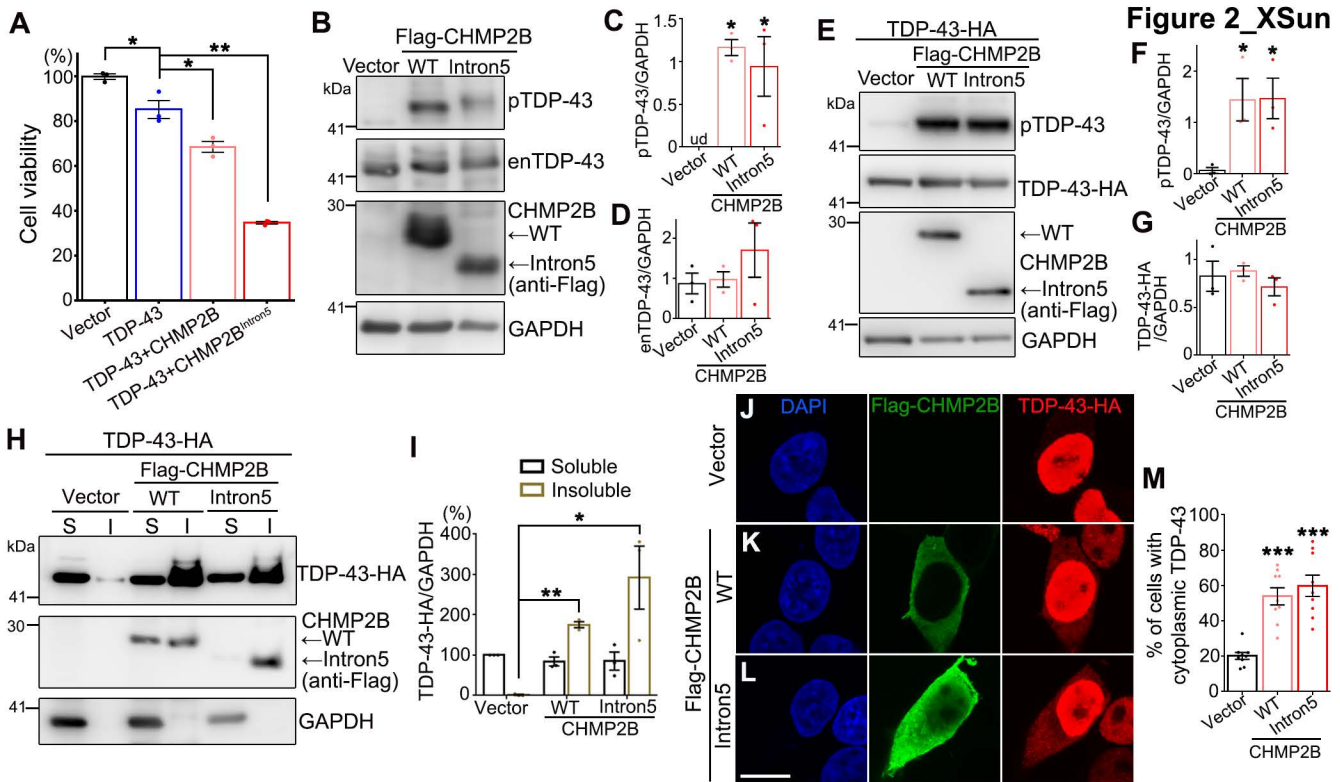

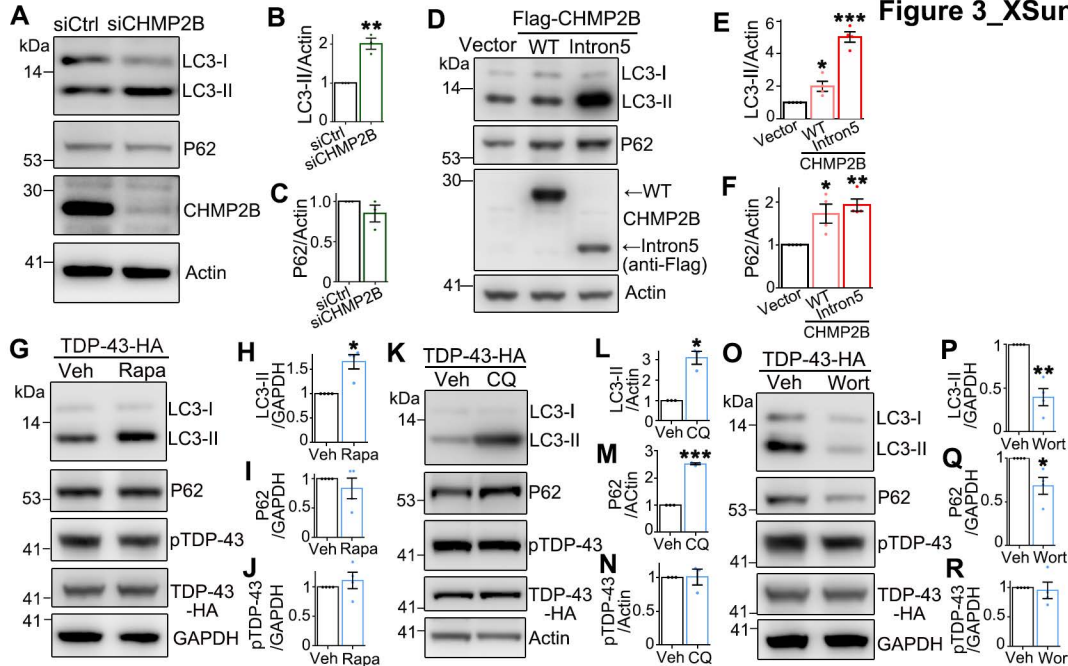

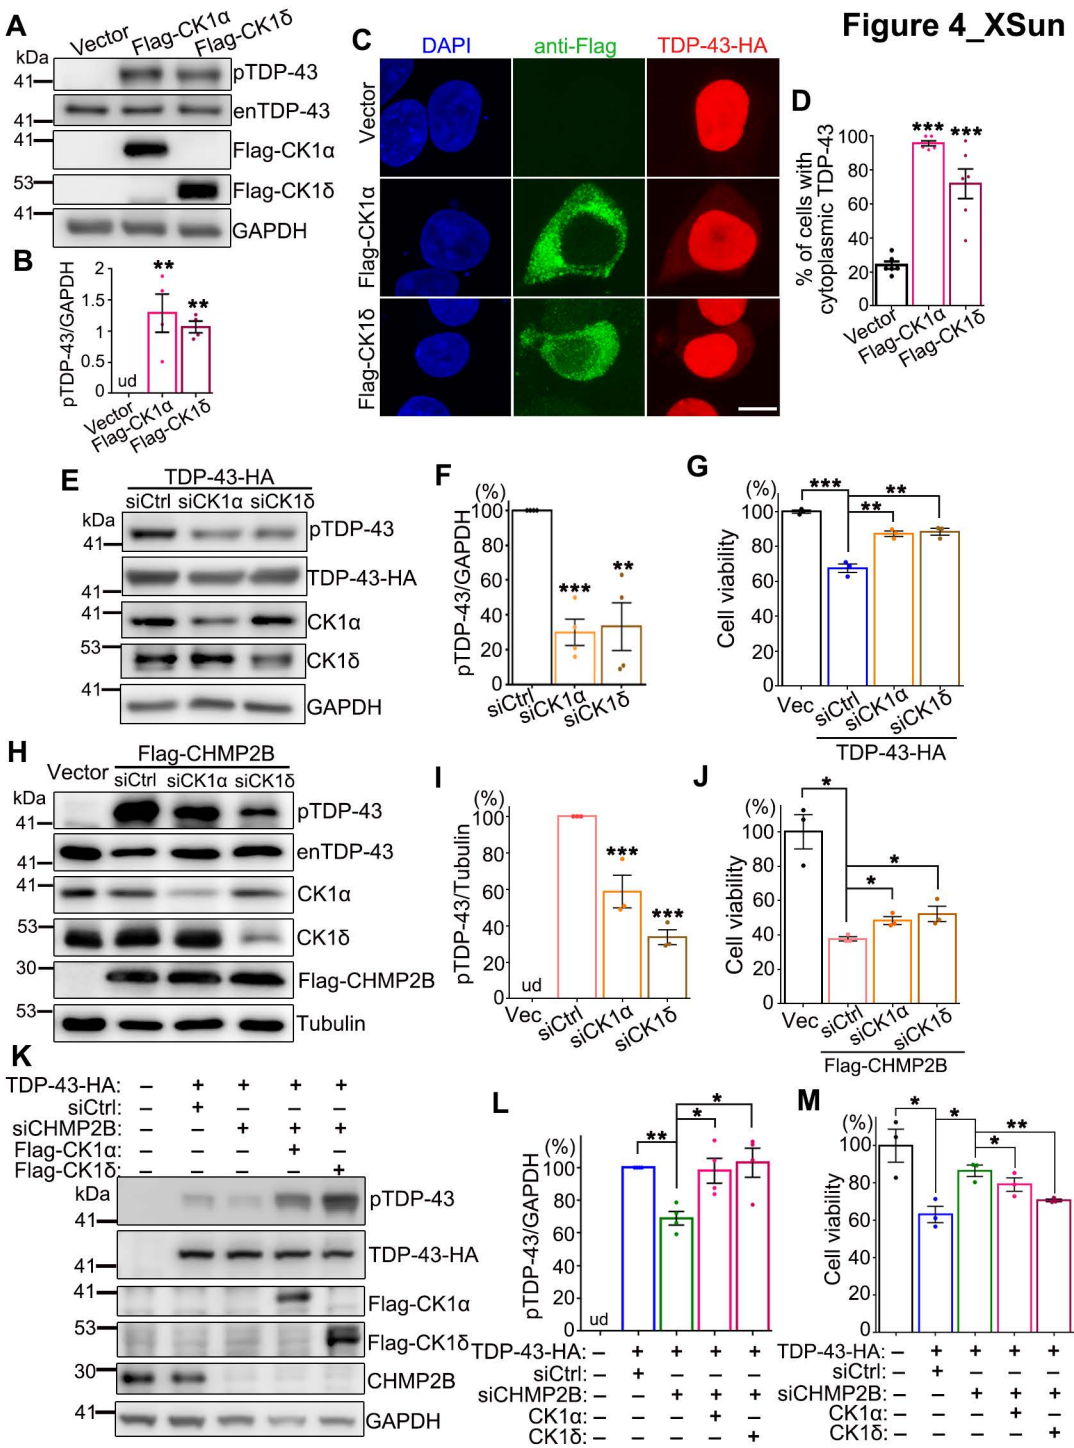



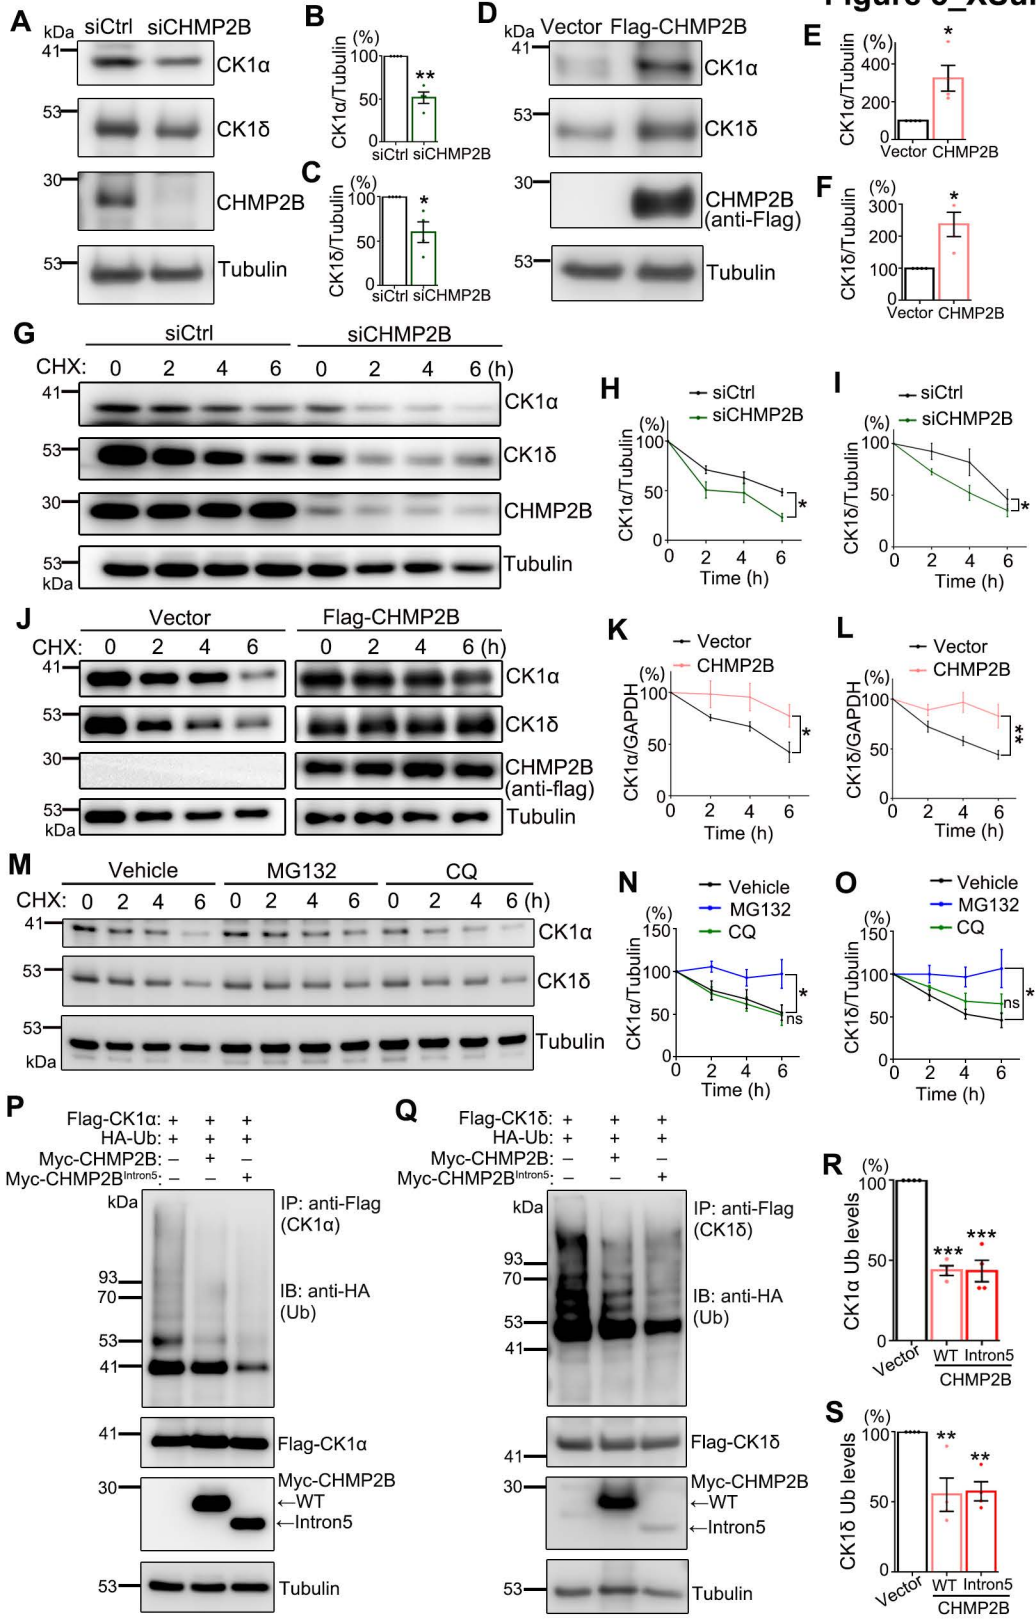

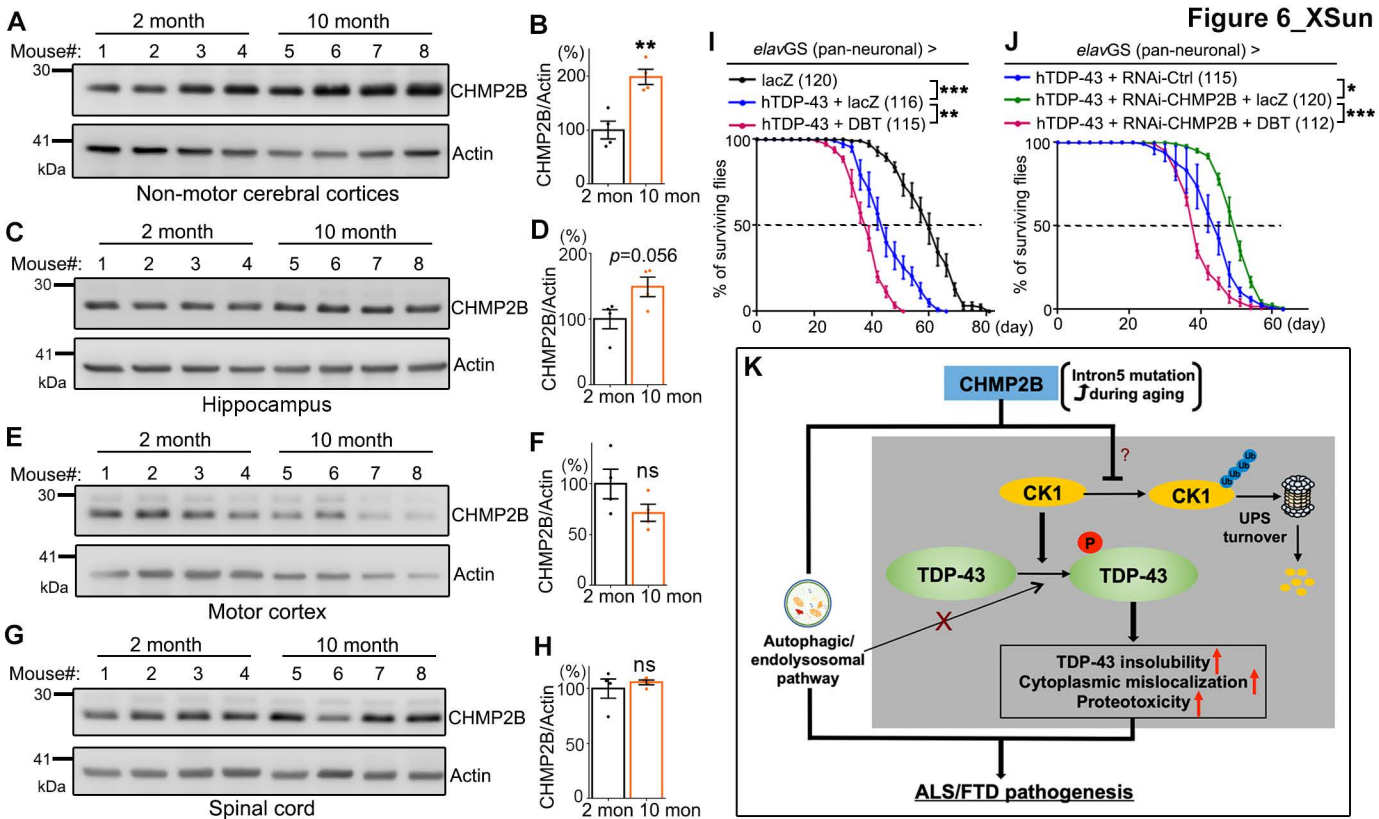



## **SUPPORTING INFORMATION**

### **CHMP2B promotes TDP-43 phosphorylation and proteotoxicity via modulating CK1 turnover independent of the autophagy-lysosomal pathway**

Xing Sun, Xue Deng, Rirong Hu, Yongjia Duan, Kai Zhang, Jihong Cui, Jiangxia Ni, Qiangqiang Wang, Yelin Chen, Ang Li, and Yanshan Fang

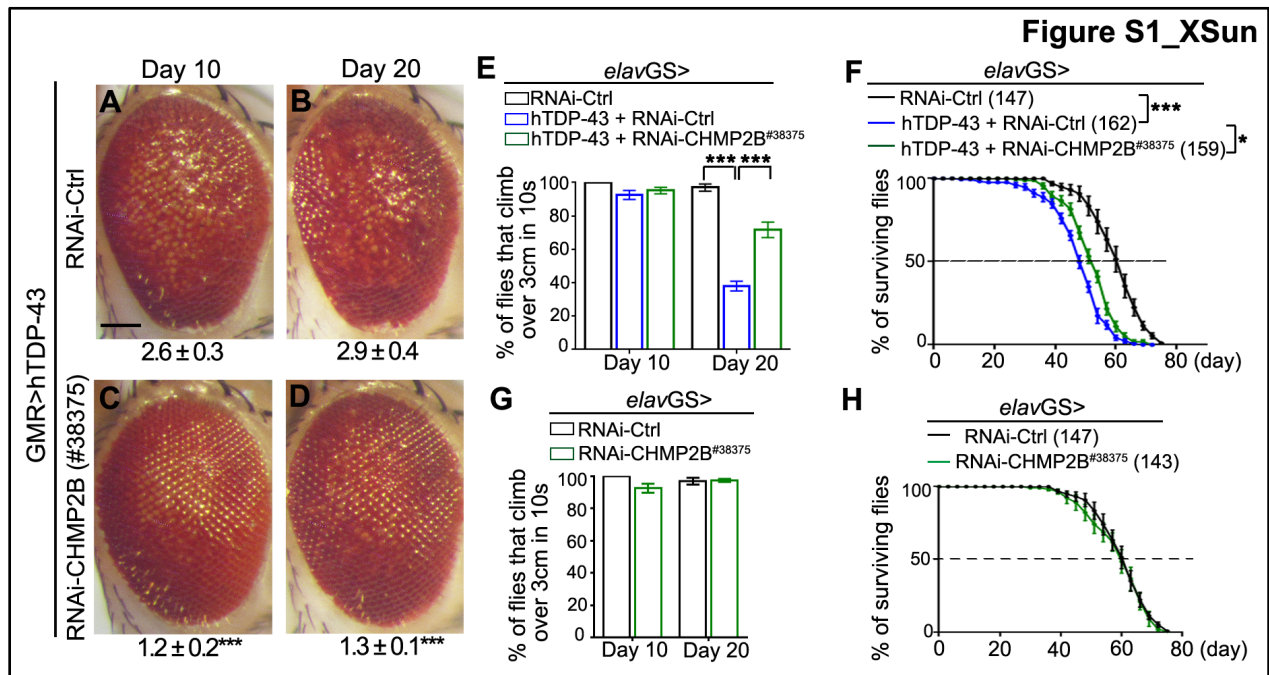

**Figure S1. Another independent transgenic RNAi-CHMP2B fly strain (#38375) also exhibits suppression of TDP-43-mediated neurotoxicity.**

(A-D) Representative z-stack images of the eyes of hTDP-43 flies expressing RNAi-Ctrl or RNAi-CHMP2B (#38375) (by GMR-Gal4) at indicated ages. The average degeneration score (mean ± SEM) and the statistical significance compared to the RNAi control line (RNAi-*mCherry*) are indicated at the bottom of each group. (E-F) The climbing (E) and lifespan (F) assays of the hTDP-43 flies with RNAi-CHMP2B expressed in adult neurons (by *elavGS*). (G-H) The climbing (G) and lifespan (H) assays of the RNAi-CHMP2B flies. No significant difference is detected compared to the RNAi-Ctrl flies. n = 10 eyes/group (A-D), ~20 flies/vial x 10 vials/group in (E, G), and the numbers of flies tested in each group are indicated in (F, H). Mean ± SEM. \*\**p* < 0.01 and \*\*\**p* < 0.001; Student's *t*-test (A-E, G) and two-way ANOVA (F, H). Scale bar: 100 μm

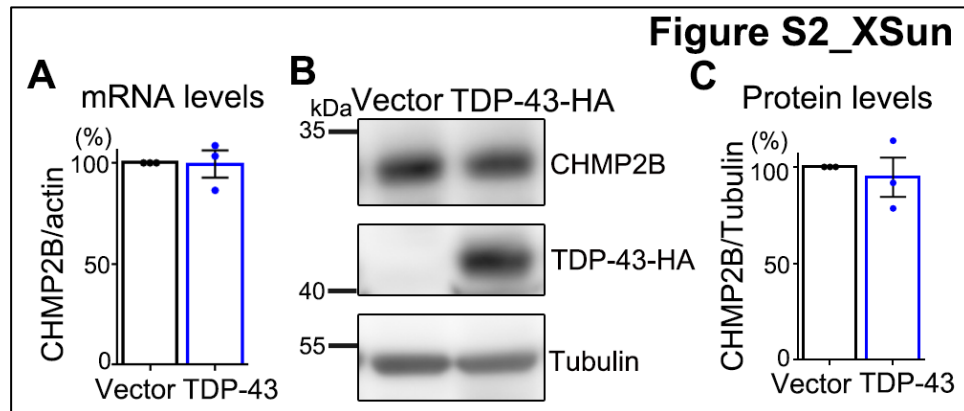

**Figure S2. OE of TDP-43 does not alter CHMP2B levels in mammalian cells.**

**(A)** The mRNA levels of *CHMP2B* in 293T cells transfected with the empty vector or TDP-43-HA are assessed by qPCR. The mRNA levels of *CHMP2B* are normalized to *actin* and shown as average percentages to the vector control group. **(B-C)** The protein levels of CHMP2B in 293T cells transfected with the empty vector or TDP-43-HA are examined by Western blotting. The protein levels of CHMP2B are normalized to Tubulin and shown as average percentages to the control group (Vector). Means  $\pm$  SEM; n = 3; Student's *t*-test.

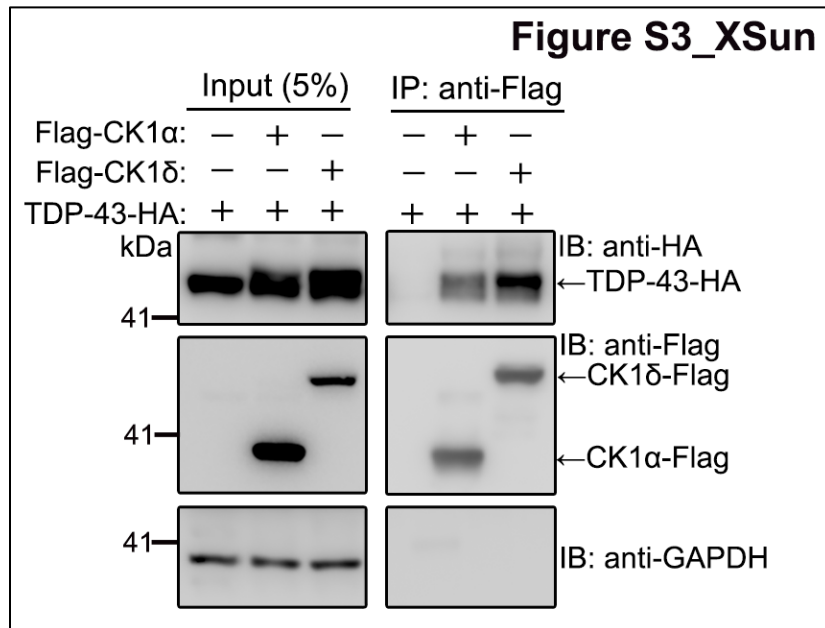

**Figure S3. CK1 can interact with TDP-43 in 293T cells.**

293T cells expressing TDP-43-HA are co-transfected with the empty vector, Flag-tagged CK1 $\alpha$  or CK1 $\delta$  and the cell lysates are immunoprecipitated with anti-Flag and examined by Western blotting with the antibodies as indicated. The co-immunoprecipitation experiments are independently repeated for 3 times

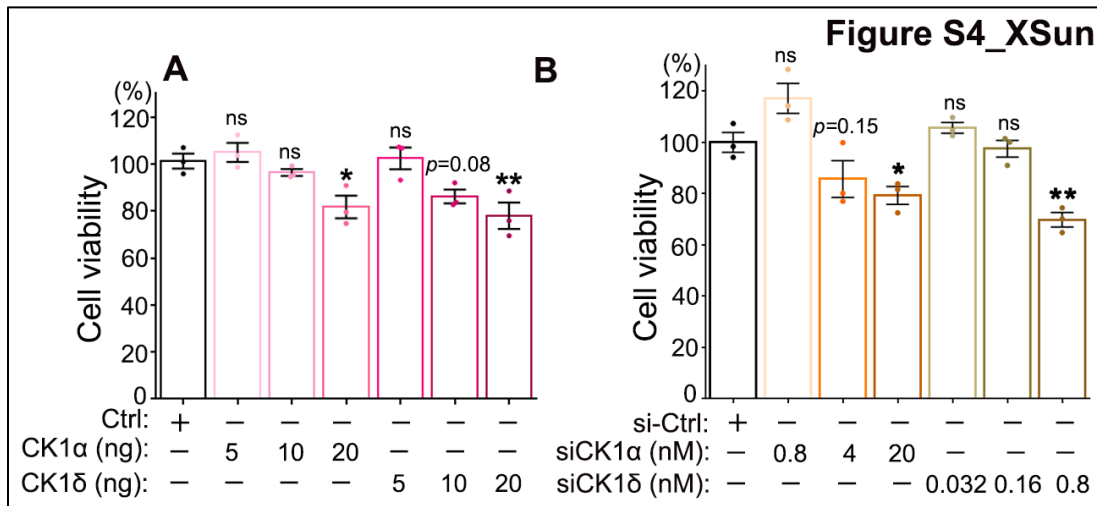

**Figure S4. Moderate OE or KD of CK1 does not cause significant cytotoxicity.**

**(A)** The viability of 293T cells transfected with Flag-CK1α or Flag-CK1δ at indicated concentrations is examined by the CCK-8 assay. Cells transfected with the empty vector are used as a control (Ctrl). **(B)** The viability of 293T cells treated with siCK1α or siCK1δ at indicated concentrations are assessed by the CCK-8 assay. The scrambled siRNA is used as a control (siCtrl). Means ± SEM; n = 3; \* $p < 0.05$ , \*\* $p < 0.01$ ; ns: not significant; one-way ANOVA.

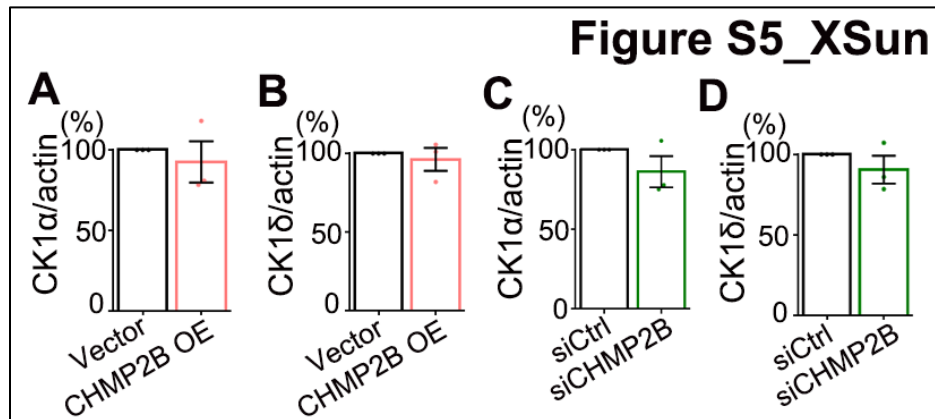

**Figure S5. The impact of OE or KD of CHMP2B on the mRNA levels of CK1α and CK1δ.**

**(A-D)** qPCR analysis of the mRNA levels of CK1α and CK1δ in 293T cells transfected with Flag-CHMP2B (A-B) or siCHMP2B (C-D). All mRNA levels are normalized to *actin* and shown as average percentages to the vector or siRNA control group. Means ± SEM; n = 3; Student's *t*-test.

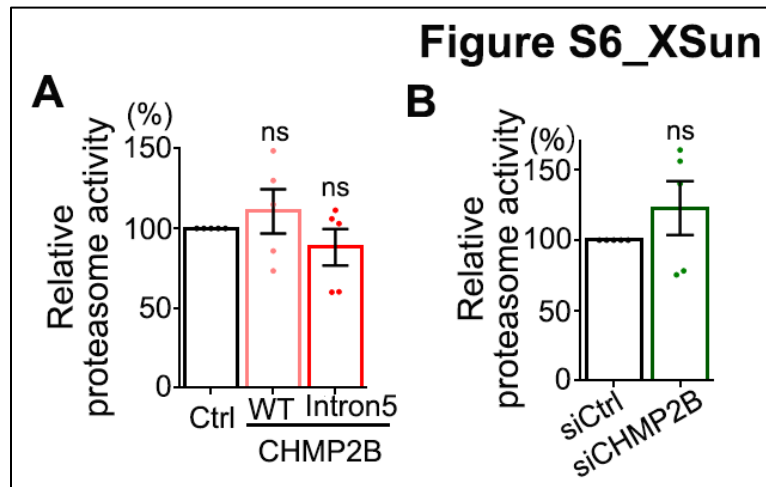

**Figure S6. OE or KD of CHMP2B does not significantly alter the cellular proteasome activity.**

**(A-B)** Relative proteasome activity of 293T cells transfected with the empty vector (Ctrl), WT or Intron5 CHMP2B (A) or treated with scrambled siRNA (siCtrl) or siCHMP2B (B). The proteasome activity is determined using an *in vitro* fluorogenic peptide cleavage assay. The relative proteolytic activities are shown as average percentages to the total fluorescence intensity of the control group at the end of the assay (set to 100%). Means  $\pm$  SEM; n = 5; ns: not significant; one-way ANOVA in (A) and Student's *t*-test in (B).
